# Supplementary material for: In vivo functional diversity of midbrain dopamine neurons within identified axonal projections
Source: eLife. 2019 Oct 3;8:e48408. doi: 10.7554/eLife.48408 (PMC6791716; doi:10.7554/eLife.48408)
Supplement: Figure 3—source data 1. — All included electrophysiological parameters analyzed for recorded control and projection-defined DA neurons. [file elife-48408-fig3-data1.xls]

## Sheet: Tabelle1
Source Data - Electrophysiological Data
DLS-lSN		avg ISI(ms)	SD(ms)	frequency(HZ)	CV (%)	SFB (%)	SFB contingency (>5%)	Skewness	Kurtosis	AP width(ms)	relative AP trough	Intraburst-Frequency	burst length (s)	pre-ISI (ms)	post-ISI (ms)	2 spikes/burst (%)	3 spikes/burst (%)	>3 spikes/burst (%)	avg spikes/burst	burst rate	bursts per minute	mean pause duration	median pause duration	number of pauses	pauses per minute	GLO	anatomical position	mediolateral cell position	Bregma (mm)
1	150105-1	0.3806	0.2117	2.6274	55.6266	1.64975	no	0.888003	3.18521	1.8	-0.49	18.4638	0.0724167	0.26175	0.85425	83.3333	16.6667	0	2.16667	0.02	1.2	NA	NA	0	0	Irregularly bursty	l-SN	1617	-3.08
2	150105-5	0.1936	0.0437	5.16616	22.5506	0.0645161	no	0.58748	3.32947	1.9	-0.46	33.3333	0.03	0.141	0.225	100	0	0	2	0.00166667	0.1	NA	NA	0	0	Pacemaker	l-SN	1385	-3.08
3	150126-3	0.3248	0.2572	3.07865	79.1903	21.5368	yes	0.663008	1.8626	1.6	-0.69	14.4055	0.18067	0.559321	0.48913	24.4275	49.6183	25.9542	3.03817	0.218333	13.1	NA	NA	0	0	Regularly bursty	l-SN	1517	-3.08
4	150127-2	0.4079	0.414	2.4518	101.491	7.88579	yes	1.17001	2.70706	1.7	-0.44	17.6252	0.133093	0.427036	0.786735	54.5455	27.2727	18.1818	2.63636	0.0733333	4.4	NA	NA	0	0	Regularly bursty	l-SN	1635	-3.08
5	150127-4	0.177	0.0618	5.64855	34.9315	4.92771	no	0.481259	2.76064	1.65	-0.52	13.9493	0.0995247	0.20956	0.250545	84	10.6667	5.33333	2.22667	0.125	7.5	NA	NA	0	0	Irregularly bursty	l-SN	1685	-2.92
6	150127-5	0.1596	0.0549	6.26753	34.3788	4.54666	no	2.09176	12.5949	1.7	-0.49	14.761	0.135267	0.196805	0.23252	77.9412	16.1765	5.88235	2.51471	0.113333	6.8	0.3752	0.364	19	1.9	Pacemaker	l-SN	1341	-2.92
7	150518-5	0.5848	0.2439	1.71009	41.71	0	no	0.446144	2.73187	2.1	-0.34	NA	NA	NA	NA	NA	NA	NA	NA	0	0	NA	NA	0	0	Irregular	l-SN	1715	-3.28
8	150520-1	0.5242	0.1244	1.9076	23.7354	0	no	0.00298162	2.89911	2.3	-0.34	NA	NA	NA	NA	NA	NA	NA	NA	0	0	NA	NA	0	0	Pacemaker	l-SN	1455	-3.08
9	150520-6	0.3385	0.216	2.95445	63.8094	0.282167	no	1.05829	2.84606	2.2	-0.52	28.629	0.1081	0.1749	0.22455	50	50	0	2.5	0.00333333	0.2	NA	NA	0	0	Irregularly bursty	l-SN	1595	-3.16
10	150702-7	0.6472	0.5398	1.54519	83.4007	11.7711	yes	0.441137	1.58425	2	-0.54	16.9143	0.0887758	0.71859	0.994316	72.9167	27.0833	0	2.27083	0.08	4.8	NA	NA	0	0	Regularly bursty	l-SN	1637	-3.16
11	150706-2	0.1947	0.0456	5.13625	23.4065	0	no	0.221207	2.88066	1.65	-0.67	NA	NA	NA	NA	NA	NA	NA	NA	0	0	NA	NA	0	0	Pacemaker	l-SN	1473	-3.08
12	150824-4	0.489	0.3246	2.04507	66.3769	8.23817	yes	0.280001	1.72054	2.25	-0.7	19.2732	0.0846932	0.375341	0.54777	72.7273	25	2.27273	2.29545	0.0733333	4.4	NA	NA	0	0	Irregularly bursty	l-SN	1395	-2.92
13	150924-1	0.2845	0.28	3.49097	98.0574	42.8298	yes	1.60372	4.19505	2.6	-0.89	15.3146	0.224838	0.810903	0.28976	7.30769	46.1538	46.5385	3.44615	0.433333	26	0.952	0.9625	183	18.3	Regularly bursty	l-SN	1399	-3.28
14	151022-7	0.24	0.231	4.16735	96.2736	36.8147	yes	1.71477	5.12085	1.75	-0.69	18.0363	0.217832	0.305166	0.495955	27.0916	33.0677	39.8406	3.66534	0.418333	25.1	0.8662	0.8269	46	4.6	Irregularly bursty	l-SN	1461	-3.16
15	151030-3	0.2229	0.1277	4.48721	57.3034	0.594354	no	1.59575	4.99512	1.85	-0.52	16.5815	0.142667	0.284167	0.208	66.6667	0	33.3333	2.66667	0.01	0.6	0.6222	0.618	59	5.9	Irregularly bursty	l-SN	1329	-3.16
DLS-mSN																					0				0
2	150130-5	0.2182	0.0744	4.58373	34.0907	3.60131	no	0.134551	2.48993	1.85	-0.69	14.7168	0.0834702	0.252147	0.279789	89.3617	10.6383	0	2.10638	0.0783333	4.7	NA	NA	0	0	Irregular	m-SN	1183	-3.4
4	150824-2	0.5855	0.4447	1.70783	75.9461	1.07527	no	0.434214	1.69339	2.2	-0.63	13.3523	0.1678	0.836375	0.922175	25	75	0	2.75	0.00666667	0.4	NA	NA	0	0	Regularly bursty	m-SN	1027	-2.92
5	150908-2	0.2176	0.0561	4.59659	25.8013	0.145085	no	0.359735	2.90684	2	-0.53	17.6806	0.059	0.1915	0.218	100	0	0	2	0.00333333	0.2	NA	NA	0	0	Pacemaker	m-SN	907	-3.28
6	151002-5	0.3032	0.0964	3.29779	31.7836	0.656897	no	1.2955	7.7816	2.35	-0.37	17.4162	0.0841667	0.334	0.5395	83.3333	16.6667	0	2.16667	0.01	0.6	0.7369	0.6975	16	1.6	Pacemaker	m-SN	1247	-3.28
7	151002-6	0.276	0.1508	3.62335	54.641	2.11592	no	0.589997	2.12584	2.1	-0.68	13.7859	0.141951	0.418668	0.404496	35.2941	58.8235	5.88235	2.70588	0.0283333	1.7	NA	NA	0	0	Irregularly bursty	m-SN	1001	-3.28
8	151103-3	0.5728	0.2702	1.7455	47.1603	0.191205	no	0.672729	3.91522	2.65	-0.9	14.2857	0.07	0.622	0.765	100	0	0	2	0.00166667	0.1	2.058	2.058	1	0.1	Irregular	m-SN	693	-3.52
9	151103-4	0.3037	0.1647	3.29238	54.2321	0.101317	no	0.966428	3.42931	1.75	-0.52	13.6986	0.073	0.266	0.197	100	0	0	2	0.00166667	0.1	NA	NA	0	0	Irregularly bursty	m-SN	1095	-3.4
10	151113-3	0.3304	0.0989	3.02696	29.9329	0	no	-0.0913383	2.3235	2.05	-0.67	NA	NA	NA	NA	NA	NA	NA	NA	0	0	NA	NA	0	0	Pacemaker	m-SN	1089	-3.28
17	150112-3	0.4019	0.1044	2.48816	25.983	0	no	-0.589097	3.55826	2.25	-0.77	NA	NA	NA	NA	NA	NA	NA	NA	0	0	NA	NA	0	0	Pacemaker	m-SN	705	-2.8
DMS-mSN																					0				0
1	141216-3	0.1433	0.0504	6.97897	35.1892	20.9936	yes	0.875279	3.72363	2.3	-0.81	14.2875	0.204503	0.201479	0.21093	57.2917	16.6667	26.0417	3.05208	0.48	28.8	0.376	0.376	2	0.2	Pacemaker	m-SN	1261	-3.08
3	150407-1	0.6046	0.3549	1.65402	58.6634	0.403633	no	0.0276393	2.00793	2.2	-0.73	13.1276	0.07635	0.89895	0.2364	100	0	0	2	0.00333333	0.2	NA	NA	0	0	Regularly bursty	m-SN	771	-2.92
11	151125-2	0.253	0.1844	3.95215	72.9239	2.1097	no	2.15795	7.43067	2.95	-0.75	14.13	0.178982	0.584229	0.388912	23.5294	58.8235	17.6471	2.94118	0.0283333	1.7	0.7818	0.774	177	17.7	Irregularly bursty	m-SN	755	-3.4
12	151201-3	0.4628	0.1198	2.16093	25.8895	0.617284	no	-0.507194	3.7357	1.95	-0.47	19.1311	0.06375	0.41575	0.58575	100	0	0	2	0.00666667	0.4	NA	NA	0	0	Pacemaker	m-SN	695	-3.16
13	151201-4	0.4416	0.3184	2.26452	72.1083	2.13549	no	0.822994	3.06191	2.2	-0.72	13.8345	0.176699	0.772242	0.567452	30	50	20	2.9	0.0166667	1	NA	NA	0	0	Regularly bursty	m-SN	821	-3.16
14	160211-2	0.2288	0.0556	4.37023	24.3202	0	no	0.239275	2.83519	2	-0.58	NA	NA	NA	NA	NA	NA	NA	NA	0	0	NA	NA	0	0	Pacemaker	m-SN	1237	-3.08
15	160211-4	0.2882	0.0941	3.46986	32.645	0	no	1.04071	4.74962	2.1	-0.43	NA	NA	NA	NA	NA	NA	NA	NA	0	0	0.79	0.781	3	0.3	Pacemaker	m-SN	801	-2.92
16	160212-1	0.3844	0.1771	2.6012	46.0735	0	no	0.645426	2.76955	2.55	-0.69	NA	NA	NA	NA	NA	NA	NA	NA	0	0	NA	NA	0	0	Irregular	m-SN	879	-3.28
18	151127-4	0.233	0.073	4.29199	31.3164	0.621359	no	0.308023	2.61635	2.6	-0.51	13.9792	0.07185	0.311913	0.294688	100	0	0	2	0.0133333	0.8	NA	NA	0	0	Pacemaker	m-SN	817	-3.28
lNAcc-mSN																					0				0
1	150902-4	0.2632	0.2469	3.79959	93.793	10.4432	yes	2.40143	9.65582	2.1	-0.29	16.2995	0.150179	0.361459	0.731981	51.7647	31.7647	16.4706	2.8	0.141667	8.5	1.1403	1.0835	56	5.6	Irregularly bursty	SN	1341	-3.08
2	160119-9	0.2457	0.1019	4.07047	41.4924	3.97215	no	0.952911	4.94384	2.3	-0.52	15.6707	0.0866409	0.242573	0.322755	84.0909	11.3636	4.54545	2.20455	0.0733333	4.4	0.7412	0.7295	6	0.6	Pacemaker	m-SN	773	-3.28
3	160119-10	0.2379	0.1558	4.20274	65.5031	3.13243	no	1.97306	6.96927	2.3	-0.35	13.4472	0.142903	0.43	0.340806	51.6129	41.9355	6.45161	2.54839	0.0516667	3.1	0.7406	0.708	99	9.9	Pacemaker	m-SN	911	-3.4
4	160210-1	0.3342	0.2362	2.99201	70.6713	5.13983	yes	0.817795	2.2152	1.95	-0.7	13.1964	0.121078	0.736617	0.3571	66.6667	33.3333	0	2.33333	0.03	1.8	NA	NA	0	0	Regularly bursty	m-SN	1279	-3.16
5	150811-6	0.6203	0.1863	1.61209	30.0366	0	no	0.633648	4.34053	2.1	-0.46	NA	NA	NA	NA	NA	NA	NA	NA	0	0	1.5257	1.5257	2	0.2	Pacemaker	m-SN	881	-3.28
6	150821-2	0.2742	0.1307	3.64735	47.6855	2.01097	no	1.93119	10.4994	2	-0.74	16.6809	0.0648591	0.284377	0.387377	100	0	0	2	0.0366667	2.2	0.9703	0.908	14	1.4	Pacemaker	m-SN	1279	-3.16
7	150827-5	0.2731	0.0713	3.66133	26.1072	1.0929	no	1.17111	8.65919	2	-0.64	18.5505	0.0591667	0.310667	0.32	100	0	0	2	0.02	1.2	0.5977	0.599	25	2.5	Pacemaker	m-SN	713	-3.08
8	150902-2	0.3713	0.4419	2.69309	119.01	56.0446	yes	1.05537	2.30936	1.7	-0.62	18.854	0.154264	0.604187	0.943306	24.4755	43.7063	31.8182	3.15035	0.476667	28.6	NA	NA	0	0	Regularly bursty	m-SN	1279	-3.08
9	150907-1	0.2149	0.06651	4.65401	30.9553	1.46796	no	0.595111	3.76717	2.4	-0.27	16.0937	0.0807489	0.262238	0.288477	84.2105	15.7895	0	2.15789	0.0316667	1.9	0.535	0.535	1	0.1	Pacemaker	m-SN	1195	-3.4
10	150907-2	0.3149	0.1001	3.17565	31.781	0	no	0.18115	2.26911	2	-0.81	NA	NA	NA	NA	NA	NA	NA	NA	0	0	NA	NA	0	0	Pacemaker	m-SN	953	-3.4
11	150916-4	0.3334	0.3011	2.99975	90.3243	23.693	yes	4.37339	60.5795	1.45	-0.47	15.2961	0.139104	0.473836	0.497892	47.1338	36.9427	15.9236	2.71338	0.261667	15.7	3.9268	2.721	4	0.4	Regularly bursty	m-SN	1091	-3.28
12	150921-2	0.2877	0.0604	3.47455	20.8823	0	no	0.112269	2.90635	1.75	-0.55	NA	NA	NA	NA	NA	NA	NA	NA	0	0	NA	NA	0	0	Pacemaker	m-SN	1243	-3.08
13	151102-6	0.1682	0.061	5.94548	36.2414	5.57735	yes	1.2509	5.66014	2.7	-0.59	14.0863	0.200241	0.196147	0.231837	48.4848	25.7576	25.7576	3.01515	0.11	6.6	0.4797	0.464	8	0.8	Pacemaker	m-SN	1037	-3.16
14	151116-2	0.8089	0.3929	1.2363	48.5715	2.69906	no	0.439596	4.24399	2.3	-0.64	23.0655	0.09085	0.763275	1.2931	50	50	0	2.5	0.0133333	0.8	3.116	3.116	1	0.1	Irregular	m-SN	705	-3.28
lNAcc-VTA																					0				0
1	150603-1	0.282	0.0991	3.54593	35.1569	0.093985	no	0.398931	2.31054	2.45	-0.55	13.6986	0.073	0.403	0.177	100	0	0	2	0.00166667	0.1	NA	NA	0	0	Irregular	VTA	791	-3.64
2	150904-5	0.2756	0.2942	3.62838	106.735	23.0699	yes	4.92394	55.2698	2	-0.66	17.4058	0.143231	0.350887	0.658959	46.5909	33.5227	19.8864	2.85227	0.293333	17.6	1.4148	1.3116	21	2.1	Irregularly bursty	VTA	593	-3.4
3	151215-4	0.1993	0.1362	5.01707	68.3641	21.5282	yes	1.95849	7.5687	1.85	-0.47	17.3662	0.182677	0.204258	0.346085	41.1483	33.0144	25.8373	3.10048	0.348333	20.9	0.725	0.7057	35	3.5	Irregularly bursty	VTA	655	-3.08
4	160114-4	0.2664	0.1315	3.75377	49.3441	0.0887705	no	1.17372	3.57717	2.15	-0.59	31.4465	0.0318	0.2966	0.5865	100	0	0	2	0.00166667	0.1	NA	NA	0	0	Irregularly bursty	VTA	821	-3.08
5	160114-6	0.4493	0.1393	2.22573	31.0067	0	no	0.621731	4.36463	1.85	-0.44	NA	NA	NA	NA	NA	NA	NA	NA	0	0	1.377	1.377	1	0.1	Pacemaker	VTA	571	-3.08
6	160115-2	0.1662	0.0455	6.01541	27.377	0	no	1.22294	5.74399	2.2	-0.59	NA	NA	NA	NA	NA	NA	NA	NA	0	0	0.4073	0.4004	8	0.8	Pacemaker	VTA	615	-3.08
7	160115-5	0.3715	0.1301	2.69185	35.0196	0.247525	no	0.608802	3.59729	2.1	-0.43	17.5214	0.0615	0.3673	0.3639	100	0	0	2	0.00333333	0.2	NA	NA	0	0	Pacemaker	VTA	565	-3.28
8	160118-8	0.2041	0.0545	4.89838	26.707	0.442327	no	1.16167	5.15827	1.85	-0.37	15.2564	0.0895	0.201917	0.219567	83.3333	16.6667	0	2.16667	0.01	0.6	0.4413	0.4431	17	1.7	Pacemaker	VTA	717	-2.92
9	160118-9	0.3339	0.0989	2.99454	29.6156	0.334076	no	0.669107	4.61906	1.8	-0.32	18.9312	0.0536	0.3568	0.275267	100	0	0	2	0.005	0.3	0.9	0.9	2	0.2	Pacemaker	VTA	761	-2.92
10	160210-10	0.3719	0.1371	2.68893	36.852	1.58621	no	0.0227459	2.54505	1.85	-0.55	21.6357	0.0614636	0.316782	0.608891	90.9091	9.09091	0	2.09091	0.0183333	1.1	NA	NA	0	0	Irregular	VTA	379	-2.92
mNAcc																					0				0
1	160216-3	0.2543	0.1087	3.93172	42.7546	1.14504	no	0.873537	3.64082	1.8	-0.4	13.9938	0.101592	0.213392	0.334425	75	25	0	2.25	0.02	1.2	NA	NA	0	0	Irregularly bursty	PN	623	-3.28
2	160216-4	0.4326	0.448	2.31132	103.564	19.6532	yes	2.26144	16.2059	1.8	-0.67	15.3887	0.142343	0.651452	0.605793	45.9184	35.7143	18.3673	2.77551	0.163333	9.8	3.934	3.415	3	0.3	Regularly bursty	PBP	641	-3.16
3	160216-8	0.3069	0.0658	3.25884	21.4277	0.102249	no	0.274199	4.21934	2	-0.6	16.6667	0.06	0.312	0.472	100	0	0	2	0.00166667	0.1	0.6701	0.6701	2	0.2	Pacemaker	PBP	727	-3.08
4	160301-3	0.4885	0.2755	2.04696	56.3826	0	no	2.65798	12.8107	2	-0.56	NA	NA	NA	NA	NA	NA	NA	NA	0	0	1.594	1.51	41	4.1	Pacemaker	PN	529	-3.28
5	160306-3	0.9255	0.4904	1.21138	59.4021	0	no	1.68411	6.59693	2.5	-0.49	NA	NA	NA	NA	NA	NA	NA	NA	0	0	2.897	2.9115	8	0.8	Pacemaker	PN	377	-3.4
6	160310-11	0.2248	0.252	4.44823	112.181	71.2626	yes	1.2614	4.21858	1.5	-0.97	56.4555	0.0624018	0.3688	0.530517	32.5696	33.7152	33.7152	3.10475	1.01833	61.1	NA	NA	0	0	Regularly bursty	PN	249	-3.08
7	160311-3	0.2975	0.0584	3.36154	19.6433	0.0991572	no	0.592921	4.58848	1.7	-0.28	14.4928	0.069	0.371	0.387	100	0	0	2	0.00166667	0.1	0.629	0.629	2	0.2	Pacemaker	PN	293	-3.28
8	160311-4	0.1542	0.0773	6.4812	50.0496	29.6477	yes	1.64942	8.14415	1.95	-0.77	17.8004	0.256406	0.143663	0.255799	27.7397	21.5753	50.6849	3.94863	0.486667	29.2	0.5012	0.4875	6	0.6	Irregular	PBP	465	-3.28
9	160315-1	0.5462	0.314	1.83067	57.4781	1.45719	no	0.73781	3.0261	2.35	-0.69	15.6308	0.0650625	0.345637	0.826425	100	0	0	2	0.0133333	0.8	NA	NA	0	0	Irregular	PN	521	-3.28
10	160315-2	0.5162	0.2117	1.93644	40.9293	0.516796	no	0.928347	4.51307	2.45	-0.46	22.959	0.0481	0.268333	0.771633	100	0	0	2	0.005	0.3	1.5155	1.5155	2	0.2	Pacemaker	m-SN	711	-3.28
11	160316-7	0.4443	0.3395	2.25095	76.4208	11.4159	yes	1.38575	5.7201	2.25	-0.55	15.0855	0.105892	0.479769	0.585954	72.3077	23.0769	4.61538	2.36923	0.108333	6.5	2.2131	2.288	3	0.3	Pacemaker	m-SN	713	-3.54
12	160324-3	0.4947	0.1632	2.02152	32.9929	0	no	0.753402	3.99664	2.1	-0.35	NA	NA	NA	NA	NA	NA	NA	NA	0	0	1.12	1.12	1	0.1	Pacemaker	PN	453	-3.28
13	160324-12	0.5728	150410	1.74649	42.1359	0	no	3.11405	18.709	2.05	-0.35	NA	NA	NA	NA	NA	NA	NA	NA	0	0	1.7212	1.6854	22	2.2	Pacemaker	PN	577	-3.28
14	160325-8	1.0457	150410	0.95631	108.411	9.23345	yes	2.96721	15.3046	2.4	-0.4	18.6589	0.068424	1.1665	0.988808	88	12	0	2.12	0.0416667	2.5	6.2875	6.014	13	1.3	Pacemaker	PN	397	-3.16
15	160330-1	0.3479	150616	2.8743	31.5577	0.115942	no	0.279348	2.87672	2.05	-0.47	14.0845	0.071	0.744	0.647	100	0	0	2	0.00166667	0.1	NA	NA	0	0		PN	425	-3.28
16	160407-10	0.4386	150616	2.28017	80.4604	10.3801	yes	1.22162	4.26024	3	-0.79	14.8475	0.122345	0.337962	0.613325	69.6429	17.8571	12.5	2.53571	0.0933333	5.6	2.368	2.368	1	0.1	Irregular	PN/PBP	601	-3.16
17	160411-9	0.4511	150626	2.21668	71.5795	11.3037	yes	1.42278	5.94457	2.2	-0.58	19.046	0.104325	0.555762	0.634105	63.3333	25	11.6667	2.5	0.1	6	2.0214	2.018	5	0.5	Pacemaker	PN	573	-3.16
18	160421-7	0.5263	0.3275	1.9002	62.2384	5.61404	yes	0.948232	4.02442	2.05	-0.51	18.8354	0.0680067	0.345653	0.84782	86.6667	13.3333	0	2.13333	0.05	3	2.265	2.265	1	0.1		PN	479	-3.4
19	160422-2	0.2431	0.0978	4.11309	40.2345	0.24321	no	1.23563	4.89128	2.1	-0.63	16.6124	0.06362	0.21755	0.23328	100	0	0	2	0.005	0.3	0.6993	0.6995	8	0.8	Pacemaker	PN	517	-3.16
20	160422-6	0.3667	0.2379	2.72675	64.8709	4.15902	no	1.2767	4.84778	2.4	-0.49	20.8866	0.0863213	0.237419	0.653155	80	13.3333	6.66667	2.26667	0.05	3	1.69	1.69	1	0.1	Irregular	PBP	525	-3.16
21	160424-7	0.1647	0.216	6.02212	130.587	90.3101	yes	1.35911	3.5268	2.3	-0.85	77.6267	0.0750629	0.351729	0.48428	13.8917	52.7068	33.4014	3.32993	1.63167	97.9	NA	NA	0	0	Regularly bursty	PN	469	-3.28
Control_l-SN																					0				0
1	140820-11	0.5135	0.5363	1.94745	104.448	49.3779	yes	0.774292	2.39104	1.75	-0.7	95.4709	0.0746972	0.529232	1.25839	31.9048	42.8571	25.2381	3.02381	0.35	21	NA	NA	0	0	Regularly bursty	l-SN	1369
2	140908-1	0.2733	0.148	3.65884	54.139	7.05829	yes	0.453689	2.01471	1.6	-0.64	14.0406	0.152375	0.317336	0.395132	45.614	38.5965	15.7895	2.7193	0.095	5.7	NA	NA	0	0	Irregularly bursty	l-SN	1491
3	140916-3	0.2167	0.07	4.61551	32.297	0.180636	no	0.373506	2.25586	1.85	-0.48	12.7154	0.14325	0.31825	0.27685	50	50	0	2.5	0.00333333	0.2	NA	NA	0	0	Regularly bursty	l-SN	1575
4	141001-1	0.2391	0.2097	4.1823	87.7133	36.1499	yes	1.36796	3.57042	1.85	-0.73	15.3625	0.212745	0.401888	0.443134	27.6515	29.5455	42.803	3.43561	0.44	26.4	0.968	0.968	1	0.1	Regularly bursty	l-SN	1657
5	141001-4	0.2411	0.0908	4.14791	37.6538	0.160772	no	0.584485	3.11359	1.95	-0.57	13.0725	0.0765	0.1875	0.365	100	0	0	2	0.00333333	0.2	NA	NA	0	0	Pacemaker	l-SN	1601
6	150312-1	0.1433	0.0908	6.97638	63.3469	35.8987	yes	2.17332	7.22522	1.95	-0.56	14.7294	0.343025	0.165338	0.298449	20.6061	22.4242	56.9697	4.55152	0.55	33	0.414132	0.415	141	14.1	Pacemaker	l-SN	1405
7	150326-5	0.1723	0.0604	5.80536	35.0658	2.29687	no	0.867515	3.41641	2	-0.63	13.8821	0.143959	0.255983	0.226397	58.0645	32.2581	9.67742	2.58065	0.0516667	3.1	NA	NA	0	0	Pacemaker	l-SN	1483
8	150410-4	0.3979	0.3531	2.51325	88.7387	9.75448	yes	0.945967	2.42329	2	-0.46	18.3256	0.0893167	0.467171	0.855721	73.0159	22.2222	4.7619	2.31746	0.105	6.3	NA	NA	0	0	Regularly bursty	l-SN	1689
9	150514-1	0.3609	0.4348	2.77095	120.482	41.6014	yes	1.29064	2.9683	1.9	-0.63	20.9882	0.147195	0.221731	1.01698	30.9735	43.8053	25.2212	3.0531	0.376667	22.6	1.5292	1.464	5	0.5	Regularly bursty	l-SN	1565
10	150515-3	0.5195	0.1111	1.92337	21.6044	0	no	-0.2072	6.48081	2.45	-0.65	NA	NA	NA	NA	NA	NA	NA	NA	0	0	NA	NA	0	0	Pacemaker	l-SN	1351
11	150515-5	0.5507	0.4608	1.81592	83.6837	4.0404	no	0.625031	1.86621	2.35	-0.67	16.4483	0.1264	0.412486	1.06898	52.9412	35.2941	11.7647	2.58824	0.0283333	1.7	NA	NA	0	0	Regularly bursty	l-SN	1739
12	150519-3	0.3179	0.1478	3.14513	46.4805	0.688924	no	0.393011	2.11193	2.35	-0.76	12.8818	0.14248	0.44998	0.35856	40	60	0	2.6	0.00833333	0.5	NA	NA	0	0	Irregularly bursty	l-SN	1327
13	150519-6	0.2089	0.0525	4.78689	25.1172	0	no	0.489389	2.77779	2.35	-0.55	NA	NA	NA	NA	NA	NA	NA	NA	0	0	NA	NA	0	0	Pacemaker	l-SN	1517
14	150626-1	0.4149	0.3926	2.41024	94.6174	2.76817	no	1.12425	2.6949	2.2	-0.62	13.7884	0.170085	0.200031	0.734411	50	35.7143	14.2857	2.85714	0.0233333	1.4	NA	NA	0	0	Regularly bursty	l-SN	1679
15	150629-2	1.087	0.6083	0.919974	55.9604	0.362319	no	2.32615	12.4839	1.8	-0.66	18.8679	0.053	0.7671	0.9275	100	0	0	2	0.00166667	0.1	NA	NA	0	0	Pacemaker	l-SN	1637
16	150629-5	0.223	0.1235	4.48468	55.3738	0.520446	no	2.04444	7.86731	2.3	-0.73	13.6343	0.167	0.18338	0.28052	40	40	20	2.8	0.00833333	0.5	0.5982	0.5982	1	0.1	Pacemaker	l-SN	1449
