# Supplementary material for: In vivo functional diversity of midbrain dopamine neurons within identified axonal projections
Source: eLife. 2019 Oct 3;8:e48408. doi: 10.7554/eLife.48408 (PMC6791716; doi:10.7554/eLife.48408)
Supplement: Figure 3—source data 2. — Labelling detection parameters (labelling intensity of individual cells, backgrounds, Delta, standard deviation of backgrounds and number of positive FG-positive marks after thresholding) for FG-labelled DA neurons. [file elife-48408-fig3-data2.xls]

## Sheet: Tabelle1
Source Data - Labelling Detection
DLS-lSN		FG detection	ImageJ Labeling int.	IJ Background	Delta IJ	StdDev (BG)	number of pos. Marks
1	150105-1	intrinsic	18399.2	2977.56	15421.6	3065.66
2	150105-5	intrinsic	16435.8	3030.01	13405.8	3334.45
3	150126-3	intrinsic	13282.5	3310.29	9972.24	3310.18
4	150127-2	intrinsic	9383.65	2615.84	6767.8	2900.45
5	150127-4	intrinsic	15081.6	5366.27	9715.34	4546.49
6	150127-5	intrinsic	12971.9	3505.23	9466.7	3348.28
7	150518-5	intrinsic	22070.3	6394.4	15675.8	5281.34
8	150520-1	intrinsic	39338.8	7086.96	32251.9	5875.89
9	150520-6	intrinsic	15204.1	4135.12	11069	4120.32
10	150702-7	intrinsic	15242.2	4711.14	10531.1	4514.15
11	150706-2	intrinsic	18718	4577.28	14140.7	4961.35
12	150824-4	intrinsic	28223.2	9072.1	19151.1	6938.47
13	150924-1	intrinsic	22579.2	8885.75	13693.4	6484.07
14	151022-7	intrinsic	30815.7	9095.78	21719.9	6591.55
15	151030-3	intrinsic	23356.3	5016.53	18339.8	4780.39
DLS-mSN
2	150130-5	intrinsic	7355.32	1783.33	5571.99	2278.13
4	150824-2	intrinsic	18818.4	6299.39	12519.1	5322.84
5	150908-2	intrinsic	32126.8	10742	21384.8	7557.32
6	151002-5	intrinsic	20497.7	7259.98	13237.7	5955.57
7	151002-6	intrinsic	14106.1	4918.47	9187.58	4565.2
8	151103-3	intrinsic	10897.9	3301.3	7596.58	3697.67
9	151103-4	intrinsic	30211.4	5451.13	24760.3	5052.74
10	151113-3	intrinsic	20541.3	4459.89	16081.4	4570.95
17	150112-3	intrinsic	21499.1	4291.65	17207.4	3330.75
DMS-mSN
1	141216-3	intrinsic	8231.25	2031.37	6199.87	2830.15
3	150407-1	intrinsic	29679	6873.78	22805.2	5918.41
11	151125-2	Antibody		3646.4		2404.78	>20
12	151201-3	Antibody		2665.43		1767.79	6
13	151201-4	Antibody		2100.25		1481.43	>20
14	160211-2	Antibody		4009.21		2306.99	12
15	160211-4	Antibody		4748.29		3320.98	>50
16	160212-1	Antibody		3443.5		2797.5	9
18	151127-4	Antibody		3381.82		2909.78	>20
lNAcc-mSN
1	150902-4	intrinsic	37305.7	14412	22893.7	9603.7
2	160119-9	Antibody		3317.01		1981.73	19
3	160119-10	Antibody		3009.49		1860.71	>20
4	160210-1	Antibody		2958.15		2228.98	18
5	150811-6	intrinsic	29239.5	7760.44	21479.1	6359.35
6	150821-2	intrinsic	46341.7	5802.23	40539.5	5034.88
7	150827-5	intrinsic	50823.1	12424.8	38398.4	8158.62
8	150902-2	intrinsic	26836	9148.88	17687.2	6677.68
9	150907-1	intrinsic	26657.2	8146.4	18510.8	6529.91
10	150907-2	intrinsic	21581	6142.48	15438.5	5273.07
11	150916-4	intrinsic	29003.6	11211.5	17792.1	7453.24
12	150921-2	intrinsic	49796.1	9277.34	40518.7	6831.98
13	151102-6	intrinsic	18253.1	6375.17	11877.9	5910.43
14	151116-2	intrinsic	26432.6	6307.1	20125.5	5370.38
lNAcc-VTA
1	150603-1	intrinsic	15161.5	5058.38	10103.1	4762.85
2	150904-5	intrinsic	36921.5	9893.86	27027.6	7467.99
3	151215-4	Antibody		2685.79		2074.68	>20
4	160114-4	Antibody		3645.43		2093.43	17
5	160114-6	Antibody		4184.82		2248.68	6
6	160115-2	Antibody		2415.73		1760.19	>20
7	160115-5	Antibody		2347.71		1685.14	>20
8	160118-8	Antibody		4291.93		2100.22	17
9	160118-9	Antibody		5160.74		2430.84	15
10	160210-10	Antibody		3863.32		3264.75	>20
mNAcc
1	160216-3	Antibody		3491.23		2736.88	12
2	160216-4	Antibody		3642.53		2083.09	10
3	160216-8	Antibody		3120.86		1745.15	10
4	160301-3	Antibody		3450.05		2484.22	5
5	160306-3	Antibody		6577.79		3111.29	>20
6	160310-11	Antibody		3592.68		2766.09	>20
7	160311-3	Antibody		5685.1		4316.94	14
8	160311-4	Antibody		4317.69		2850.99	13
9	160315-1	Antibody		5493.45		4084.69	>20
10	160315-2	Antibody		4661.54		3829.76	7
11	160316-7	Antibody		2966.13		2089.19	>20
12	160324-3	Antibody		3522.38		2464.69	17
13	160324-12	Antibody		3535.16		2670.76	>20
14	160325-8	Antibody		2368.54		1659.2	16
15	160330-1	Antibody		2065.34		1529.12	10
16	160407-10	Antibody		1931.72		1653.16	>20
17	160411-9	Antibody		2545.28		1681.74	>20
18	160421-7	Antibody		2117.18		1724.85	>20
19	160422-2	Antibody		1522.18		1335.56	>20
20	160422-6	Antibody		1586.9		1340.05	6
21	160424-7	Antibody		2068.5		1385.69	11
