# Supplementary material for: In vivo functional diversity of midbrain dopamine neurons within identified axonal projections
Source: eLife. 2019 Oct 3;8:e48408. doi: 10.7554/eLife.48408 (PMC6791716; doi:10.7554/eLife.48408)
Supplement: Figure 4—figure supplement 4—source data 1. — All included electrophysiological parameters for recorded DA neurons in awake mice during home cage activity. Data were collected in the context of a previous study (Duvarci et al., 2018). [file elife-48408-fig4-figsupp4-data1.xls]

## Sheet: Tabelle1
	mean freq	median freq	SD (mean freq)	CV	sfb	Skewness	Kurtosis	mean-IBF	burst length	pre-ISI	avg SPB	burst rate	mean pause duration	number of pauses
1	4.75432	12.0742	0.512794	243.799	77.5675	10.0286	153.497	62.9985	0.191527	0.353148	4.73876	0.778333	1.78354	97
2	1.7389	3.99509	2.5608	445.297	48.659	22.9127	616.71	37.9822	0.0817321	0.562334	2.74595	0.308333	8.57009	25
3	4.98023	33.2845	1.59825	795.963	95.4759	16.3451	318.53	39.5029	0.796675	1.74133	23.5455	0.201667	2.51829	93
4	1.98206	36.5337	1.61728	320.555	86.7845	6.21641	55.3836	52.0335	0.178086	1.76069	7.11034	0.241667	3.09257	106
5	5.32097	5.97065	0.116874	62.1883	33.6361	1.34951	5.87639	19.9491	0.129802	0.212502	2.83377	0.631667	0.728091	9
6	2.23168	2.62116	0.299373	66.8104	8.35821	1.44325	6.1265	23.7996	0.0757192	0.444798	2.28571	0.0816667	1.84029	7
7	1.66907	2.0856	0.465179	77.6416	5.49451	2.34346	13.7644	23.5272	0.0609638	0.664848	2.11538	0.0433333	3.30098	7
8	2.31866	2.69582	0.314767	72.9839	15.0144	1.44727	6.14349	23.9004	0.0869179	0.34284	2.4881	0.14	1.93057	5
9	2.25668	2.65645	0.297796	67.2031	7.82288	1.5482	6.74681	23.3433	0.0777174	0.372365	2.35556	0.075	1.87727	9
10	3.00906	4.14412	0.285586	85.9345	7.91805	3.40156	23.5796	25.4077	0.0777212	0.334384	2.2	0.108333	1.53515	45
11	2.7854	2.9933	0.241954	67.3938	18.8995	1.36507	6.63941	23.3585	0.0913508	0.30904	2.56911	0.205	1.42074	5
12	7.20215	12.3583	0.145456	104.759	82.6389	1.73056	6.22651	31.0515	0.14605	0.281907	3.85529	1.54333	0.804904	10
13	4.3284	22.7399	0.803717	347.881	85.3565	9.20165	116.369	31.1043	0.385574	0.720026	10.1606	0.363333	1.5506	171
14	2.59968	3.65714	0.347431	90.321	20.641	2.00284	8.32152	22.4614	0.0879614	0.408222	2.38519	0.225	1.85799	22
15	2.58087	11.6591	0.966465	249.432	72.9941	5.68478	45.3729	40.1307	0.143327	0.768707	4.30385	0.433333	2.63894	87
16	5.13335	32.585	0.606828	311.506	86.9198	10.9169	182.408	50.2909	0.213807	0.61134	7.45961	0.598333	1.18591	170
17	0.969749	1.91562	1.75147	169.848	9.82759	6.8676	73.1311	22.6081	0.0565839	0.872853	2.03571	0.0466667	7.47032	20
18	5.44951	13	0.254246	138.552	75.7492	3.0225	19.1865	53.5277	0.133807	0.392307	4.32286	0.955	1.1525	26
19	1.445	3.07414	1.26375	182.612	17.0139	7.78438	98.6073	23.1128	0.0626702	0.552662	2.16176	0.113333	4.38657	48
