# Supplementary material for: In vivo functional diversity of midbrain dopamine neurons within identified axonal projections
Source: eLife. 2019 Oct 3;8:e48408. doi: 10.7554/eLife.48408 (PMC6791716; doi:10.7554/eLife.48408)
Supplement: Figure 4—source data 1. — (A1, B1) Mean (N = 3 animals for each projection) and accumulated numbers of FG-labelled and projection-defined DA neurons in distinct midbrain regions. (A2, B2) Percentages of mean and accumulated projection population. (A3, B3) Percentages of mean and accumulated local cell population. [file elife-48408-fig4-data1.xls]

## Sheet: Tabelle1
Source Data - Anatomical Reconstruction
A1			mean absolute						B1			accumulated absolute
	lSN	mSN	PBP	PN	IF	RRF				lSN	mSN	PBP	PN	IF	RRF
DLS	476	466.3	207.3	12	0	119			DLS	1428	1399	622	36	0	357
DMS	91.7	702.7	160.7	37.7	0	66.7			DMS	257	2108	482	119	0	200
lNAcc	145	456.3	721	153.3	10.3	193			lNAcc	435	1369	2163	460	31	579
mNAcc	2.3	124	120	455.3	142.3	19			mNAcc	7	372	510	1366	427	57
A2			mean % of projection						B2			accumulated % of projection
	lSN	mSN	PBP	PN	IF	RRF				lSN	mSN	PBP	PN	IF	RRF
DLS	37.16	36.4	16.19	0.94	0	9.29			DLS	37.17	36.41	16.19	0.94	0	9.29
DMS	8.64	66.23	15.14	3.55	0	6.28			DMS	8.07	66.21	15.14	3.74	0	6.28
lNAcc	8.64	27.18	42.94	9.13	0.62	11.49			lNAcc	8.64	27.18	42.94	9.13	0.62	11.49
mNAcc	0.26	13.58	18.62	49.87	15.59	2.08			mNAcc	0.26	13.58	18.62	49.87	15.59	2.08
A3			mean % of anatomical SOURCE						B3			accumulated % of anatomical SOURCE
	lSN	mSN	PBP	PN	IF	RRF				lSN	mSN	PBP	PN	IF	RRF
DLS	66.57	26.66	16.47	1.82	0	29.92			DLS	67.14	26.66	16.47	1.82	0	29.92
DMS	12.82	40.17	12.76	5.72	0	16.76			DMS	12.08	40.17	12.76	6.01	0	16.76
lNAcc	20.28	26.09	57.27	23.29	6.77	48.53			lNAcc	20.45	26.09	57.27	23.22	6.77	48.53
mNAcc	0.33	7.09	13.5	69.16	93.23	4.78			mNAcc	0.33	7.09	13.5	68.96	93.23	4.78
