# Supplementary material for: In vivo functional diversity of midbrain dopamine neurons within identified axonal projections
Source: eLife. 2019 Oct 3;8:e48408. doi: 10.7554/eLife.48408 (PMC6791716; doi:10.7554/eLife.48408)
Supplement: Figure 4—source data 2. [file elife-48408-fig4-data2.xls]

## Sheet: Tabelle1
Source Data - Anatomical Reconstruction - DLS
											DLS 1																					DLS 2
Bregma (mm)		PBP			PN			IF			mSN			lSN			RRF			all			PBP			PN			IF			mSN			lSN			RRF			all (of TH+/FG+)			PBP			PN
	FG+	TH+/FG+	CB+/TH+/FG+	FG+	TH+/FG+	CB+/TH+/FG+	FG+	TH+/FG+	CB+/TH+/FG+	FG+	TH+/FG+	CB+/TH+/FG+	FG+	TH+/FG+	CB+/TH+/FG+	FG+	TH+/FG+	CB+/TH+/FG+	FG+	TH+/FG+	CB+/TH+/FG+	FG+	TH+/FG+	CB+/TH+/FG+	FG+	TH+/FG+	CB+/TH+/FG+	FG+	TH+/FG+	CB+/TH+/FG+	FG+	TH+/FG+	CB+/TH+/FG+	FG+	TH+/FG+	CB+/TH+/FG+	FG+	TH+/FG+	CB+/TH+/FG+	FG+	TH+/FG+	CB+/TH+/FG+	FG+	TH+/FG+	CB+/TH+/FG+	FG+	TH+/FG+	CB+/TH+/FG+	FG+
-4.16	-	-	-	-	-	-	-	-	-	-	-	-	-	-	-	12	12	0		12		-	-	-	-	-	-	-	-	-	-	-	-	-	-	-	21	21	0		21		-	-	-	-	-	-	-
(%)	-	-	-	-	-	-	-	-	-	-	-	-	-	-	-		100					-	-	-	-	-	-	-	-	-	-	-	-	-	-	-		100					-	-	-	-	-	-	-
-4.04	-	-	-	-	-	-	-	-	-	-	-	-	-	-	-	32	31	0		31		-	-	-	-	-	-	-	-	-	-	-	-	-	-	-	57	57	0		57		-	-	-	-	-	-	-
%	-	-	-	-	-	-	-	-	-	-	-	-	-	-	-		100					-	-	-	-	-	-	-	-	-	-	-	-	-	-	-		100					-	-	-	-	-	-	-
-3.88	5	5	1	-	-	-	-	-	-	81	81	0	64	63	0	45	44	0		193		5	5	0	-	-	-	-	-	-	108	106	0	78	78	0	63	62	0		251		2	2	0	-	-	-	-
(%)		3		-	-	-	-	-	-		42			33			23						1.99203		-	-	-	-	-	-		42.2311			31.0757			24.7012						1.0101		-	-	-	-
3.64	20	19	1	-	-	-	-	-	-	83	83	1	63	62	0	-	-	-		164		56	56	0	-	-	-	-	-	-	85	85	0	65	64	0	-	-	-		205		30	30	0	-	-	-	-
(%)		12		-	-	-	-	-	-		51			38		-	-	-					27.3171		-	-	-	-	-	-		41.4634			31.2195		-	-	-					21.4286		-	-	-	-
-3.52	14	12	0	-	-	-	-	-	-	56	54	0	54	54	0	-	-	-		120		23	23	0	-	-	-	-	-	-	65	65	0	62	62	0	-	-	-		150		20	17	0	-	-	-	-
(%)		10		-	-	-	-	-	-		45			45		-	-	-					15.3333		-	-	-	-	-	-		43.3333			41.3333		-	-	-					17.5258		-	-	-	-
-3.4	17	16	0	-	-	-	-	-	-	43	43	0	37	37	1	-	-	-		96		28	25	0	-	-	-	-	-	-	24	24	0	62	62	0	-	-	-		111		33	31	1	-	-	-	-
(%)		17		-	-	-	-	-	-		45			39		-	-	-					22.5225		-	-	-	-	-	-		21.6216			55.8559		-	-	-					25		-	-	-	-
-3.28	18	16	0	-	-	-	-	-	-	69	69	0	24	24	0	-	-	-		109		24	23	1	1	1	0	-	-	-	55	55	1	42	42	0	-	-	-		121		28	27	0	-	-	-	-
(%)		15		-	-	-	-	-	-		63			22		-	-	-					19.0083			0.826446		-	-	-		45.4545			34.7107		-	-	-					25.7143		-	-	-	-
-3.16	18	18	0	3	3	0	-	-	-	51	51	1	79	79	0	-	-	-		151		32	32	2	2	2	0	-	-	-	45	45	0	80	80	0	-	-	-		159		25	25	0	6	6	0	-
(%)		12			2		-	-	-		34			52		-	-	-					20.1258			1.25786		-	-	-		28.3019			50.3145		-	-	-					13.369			3.20856		-
-3.08	52	52	0	4	4	0	-	-	-	74	74	0	42	42	0	-	-	-		172		49	49	0	7	7	0	-	-	-	97	96	0	84	83	0	-	-	-		235		57	57	1	13	13	0	-
(%)		30			1		-	-	-		43			24		-	-	-					20.8511			2.97872		-	-	-		40.8511			35.3191		-	-	-					27.2727			6.2201		-
-2.92	18	18	0	-	-	-	-	-	-	25	25	0	29	29	0	-	-	-		72		33	32	0	-	-	-	-	-	-	57	57	0	46	46	0	-	-	-		135		23	23	0	-	-	-	-
(%)		25		-	-	-	-	-	-		35			40		-	-	-					23.7037		-	-	-	-	-	-		42.2222			34.0741		-	-	-					21.2963		-	-	-	-
-2.8	-	-	-	-	-	-	-	-	-	-	-	-	3	3	0	-	-	-		3		7	7	0	-	-	-	-	-	-	13	13	0	3	3	0	-	-	-		23		2	2	0	-	-	-	-
(%)	-	-	-	-	-	-	-	-	-	-	-	-		100		-	-	-					30.4348		-	-	-	-	-	-		56.5217			13.0435		-	-	-					9.09091		-	-	-	-
all	162	156	2	7	7	0	-	-	-	482	480	2	395	393	1	89	87	0	1135	1123	5	257	252	3	10	10	0	-	-	-	549	546	1	522	520	0	141	140	0	1479	1468	4	220	214	2	19	19	0	-
FG+ of all TH+ (%)		13.8914			0.62333			0			43			34.9955			7.74711			100			17.1662			0.681199			0			37.1935			35.4223			9.53678			100			17.1063			1.51878
TH+(%)		96.2963			100						99.5851			99.4937			97.7528			98.9427			98.0545			100						99.4536			99.6169			99.2908			99.2563			97.2727			100
CB+(%)		1.28205			0						0.416667			0.254453			0			0.445236			1.19048			0						0.18315			0			0			0.27248			0.934579			0
[truncated: 35 more columns]
