# Supplementary material for: In vivo functional diversity of midbrain dopamine neurons within identified axonal projections
Source: eLife. 2019 Oct 3;8:e48408. doi: 10.7554/eLife.48408 (PMC6791716; doi:10.7554/eLife.48408)
Supplement: Figure 4—source data 3. [file elife-48408-fig4-data3.xls]

## Sheet: Tabelle1
Source Data - Anatomical Reconstruction - DMS
											DMS 1																					DMS 2
Bregma (mm)		PBP			PN			IF			mSN			lSN			RRF			all			PBP			PN			IF			mSN			lSN			RRF			all (of TH+/FG+)			PBP			PN
	FG+	TH+/FG+	CB+/TH+/FG+	FG+	TH+/FG+	CB+/TH+/FG+	FG+	TH+/FG+	CB+/TH+/FG+	FG+	TH+/FG+	CB+/TH+/FG+	FG+	TH+/FG+	CB+/TH+/FG+	FG+	TH+/FG+	CB+/TH+/FG+	FG+	TH+/FG+	CB+/TH+/FG+	FG+	TH+/FG+	CB+/TH+/FG+	FG+	TH+/FG+	CB+/TH+/FG+	FG+	TH+/FG+	CB+/TH+/FG+	FG+	TH+/FG+	CB+/TH+/FG+	FG+	TH+/FG+	CB+/TH+/FG+	FG+	TH+/FG+	CB+/TH+/FG+	FG+	TH+/FG+	CB+/TH+/FG+	FG+	TH+/FG+	CB+/TH+/FG+	FG+	TH+/FG+	CB+/TH+/FG+	FG+
-4.16	-	-	-	-	-	-	-	-	-	-	-	-	-	-	-	3	3	0		3		-	-	-	-	-	-	-	-	-	-	-	-	-	-	-	3	3	0		3		-	-	-	-	-	-	-
(%)	-	-	-	-	-	-	-	-	-	-	-	-	-	-	-		100					-	-	-	-	-	-	-	-	-	-	-	-	-	-	-		100					-	-	-	-	-	-	-
-4.04	-	-	-	-	-	-	-	-	-	-	-	-	-	-	-	20	20	4		20		-	-	-	-	-	-	-	-	-	-	-	-	-	-	-	27	27	5		27		-	-	-	-	-	-	-
%	-	-	-	-	-	-	-	-	-	-	-	-	-	-	-		100					-	-	-	-	-	-	-	-	-	-	-	-	-	-	-		100					-	-	-	-	-	-	-
-3.88	7	7	4	-	-	-	-	-	-	40	40	0	9	9	0	47	47	10		103		9	9	5	-	-	-	-	-	-	57	57	0	2	2	0	47	46	4		114		15	15	4	-	-	-	-
(%)		7		-	-	-	-	-	-		39			9			46						7.89474		-	-	-	-	-	-		50			1.75439			40.3509						15.3061		-	-	-	-
3.64	36	36	14	10	10	8	-	-	-	93	93	8	14	14	2	-	-	-		153		43	43	13	16	16	13	-	-	-	102	102	3	12	12	0	-	-	-		173		46	46	12	3	2	2	-
(%)		24			7		-	-	-		61			9		-	-	-					24.8555			9.24855		-	-	-		58.9595			6.93642		-	-	-					34.0741			1.48148		-
-3.52	29	29	9	4	4	0	-	-	-	79	79	14	10	10	2	-	-	-		122		49	47	23	1	1	1	-	-	-	85	85	13	10	10	0	-	-	-		143		30	28	6	2	2	2	-
(%)		24			3		-	-	-		65			8		-	-	-					32.8671			0.699301		-	-	-		59.4406			6.99301		-	-	-					22.5806			1.6129		-
-3.4	6	4	2	4	3	0	-	-	-	82	80	25	4	4	0	-	-	-		91		18	16	4	2	0	0	-	-	-	81	81	22	18	18	2	-	-	-		115		16	14	7	1	1	1	-
(%)		4			3		-	-	-		88			4		-	-	-					13.913			0		-	-	-		70.4348			15.6522		-	-	-					14			1		-
-3.28	8	8	4	2	2	0	-	-	-	136	136	29	12	12	1	-	-	-		158		16	12	4	3	3	3	-	-	-	124	124	47	12	12	0	-	-	-		151		10	10	6	7	6	4	-
(%)		5			1		-	-	-		86			8		-	-	-					7.94702			1.98675		-	-	-		82.1192			7.94702		-	-	-					6.49351			3.8961		-
-3.16	24	24	5	10	10	5	-	-	-	73	73	6	15	15	0	-	-	-		122		23	23	10	18	18	11	-	-	-	76	76	16	22	22	0	-	-	-		139		14	14	3	7	7	4	-
(%)		20			8		-	-	-		60			12		-	-	-					16.5468			12.9496		-	-	-		54.6763			15.8273		-	-	-					10.219			5.10949		-
-3.08	4	4	2	6	6	1	-	-	-	134	134	35	5	5	0	-	-	-		149		28	27	6	21	21	6	-	-	-	108	108	9	11	11	3	-	-	-		167		11	11	5	7	7	4	-
(%)		3		-	4	-	-	-	-		89			3		-	-	-					16.1677			12.5749		-	-	-		64.6707			6.58683		-	-	-					7.74648			4.92958		-
-2.92	4	4	1	-	-	-	-	-	-	64	64	13	3	3	0	-	-	-		71		24	24	12	-	-	-	-	-	-	99	99	20	13	12	2	-	-	-		135		26	26	10	-	-	-	-
(%)		6		-	-	-	-	-	-		90			4		-	-	-					17.7778		-	-	-	-	-	-		73.3333			8.88889		-	-	-					28.5714		-	-	-	-
-2.8	-	-	-	-	-	-	-	-	-	5	5	3	-	-	-	-	-	-		5		-	-	-	-	-	-	-	-	-	9	9	4	2	2	1	-	-	-		11		1	1	1	-	-	-	-
(%)	-	-	-	-	-	-	-	-	-		100		-	-	-	-	-	-				-	-	-	-	-	-	-	-	-		81.8182			18.1818		-	-	-					12.5		-	-	-	-
all	125	116	42	30	29	13	-	-	-	706	704	133	72	72	7	70	70	14	1003	997	209	210	201	77	61	59	34	-	-	-	741	741	134	102	101	8	77	76	9	1191	1178	262	169	165	54	27	25	17	0
of all TH+ (%)		11.6349			2.90873		-	0	-		70.6118			7.22166			7.02106			100			17.0628			5.00849		-	0	-		62.9032			8.57385			6.45161			100			16.3528			2.4777
TH+(%)		92.8			96.6667						99.7167			100			100			99.4018			95.7143			96.7213						100			99.0196			98.7013			98.9085			97.6331			92.5926
CB+(%)		36.2069			44.8276						18.892			9.72222			20			20.9629			38.3085			57.6271						18.0837			7.92079			11.8421			22.2411			32.7273			68
[truncated: 35 more columns]
