# Supplementary material for: In vivo functional diversity of midbrain dopamine neurons within identified axonal projections
Source: eLife. 2019 Oct 3;8:e48408. doi: 10.7554/eLife.48408 (PMC6791716; doi:10.7554/eLife.48408)
Supplement: Figure 4—source data 4. [file elife-48408-fig4-data4.xls]

## Sheet: Tabelle1
Source Data - Anatomical Reconstruction - lNAcc
											lNAcc 1																					lNAcc 2
Bregma (mm)		PBP			PN			IF			mSN			lSN			RRF			all			PBP			PN			IF			mSN			lSN			RRF			all (of TH+/FG+)			PBP			PN
	FG+	TH+/FG+	CB+/TH+/FG+	FG+	TH+/FG+	CB+/TH+/FG+	FG+	TH+/FG+	CB+/TH+/FG+	FG+	TH+/FG+	CB+/TH+/FG+	FG+	TH+/FG+	CB+/TH+/FG+	FG+	TH+/FG+	CB+/TH+/FG+	FG+	TH+/FG+	CB+/TH+/FG+	FG+	TH+/FG+	CB+/TH+/FG+	FG+	TH+/FG+	CB+/TH+/FG+	FG+	TH+/FG+	CB+/TH+/FG+	FG+	TH+/FG+	CB+/TH+/FG+	FG+	TH+/FG+	CB+/TH+/FG+	FG+	TH+/FG+	CB+/TH+/FG+	FG+	TH+/FG+	CB+/TH+/FG+	FG+	TH+/FG+	CB+/TH+/FG+	FG+	TH+/FG+	CB+/TH+/FG+	FG+
-4.16	-	-	-	-	-	-	-	-	-	-	-	-	-	-	-	32	32	20		32		-	-	-	-	-	-	-	-	-	-	-	-	-	-	-	50	49	21	50	49	21	-	-	-	-	-	-	-
(%)	-	-	-	-	-	-	-	-	-	-	-	-	-	-	-		100					-	-	-	-	-	-	-	-	-	-	-	-	-	-	-		100					-	-	-	-	-	-	-
-4.04	-	-	-	-	-	-	-	-	-	-	-	-	-	-	-	67	67	38		67		-	-	-	-	-	-	-	-	-	-	-	-	-	-	-	91	91	39	91	91	39	-	-	-	-	-	-	-
%	-	-	-	-	-	-	-	-	-	-	-	-	-	-	-		100					-	-	-	-	-	-	-	-	-	-	-	-	-	-	-		100					-	-	-	-	-	-	-
-3.88	35	35	25	-	-	-	-	-	-	23	23	0	2	2	0	97	97	36		157		30	30	24	-	-	-	-	-	-	4	4	0	9	9	1	52	52	21	95	95	46	12	12	10	-	-	-	-
(%)		22.293		-	-	-	-	-	-		14.6497			1.27389			61.7834						31.5789		-	-	-	-	-	-		4.21053			9.47368			54.7368						6.70391		-	-	-	-
3.64	118	118	56	27	27	24	12	9	8	59	59	0	21	21	0	-	-	-		234		55	55	34	18	18	15	6	6	6	2	2	0	25	25	4	-	-	-	106	106	59	86	85	39	10	10	10	-
(%)		49.1453			11.5385			3.84615			25.2137			8.97436		-	-	-					51.8868			16.9811			5.66038			1.88679			23.5849		-	-	-					39.1705			4.60829		-
-3.52	135	132	70	26	26	23	2	0	0	53	52	0	30	30	0	-	-	-		240		99	97	68	24	24	20	1	0	0	16	16	3	20	20	3	-	-	-	160	157	94	117	117	65	9	9	0	-
(%)		54.1667			10.8333			0			21.6667			12.5		-	-	-					61.7834			15.2866			0			10.1911			12.7389		-	-	-					54.4186			4.18605		-
-3.4	156	150	97	25	25	4	3	2	0	62	62	17	16	16	0	-	-	-		254		122	116	79	19	18	18	1	1	0	44	44	17	18	18	3	-	-	-	204	197	117	91	88	52	16	16	15	-
(%)		59.0551			9.84252			0.787402			24.4094			6.29921		-	-	-					58.8832			9.13706			0.507614			22.335			9.13706		-	-	-					44.6701			8.12183		-
-3.28	83	79	46	58	56	49	2	2	0	72	72	22	16	16	0	-	-	-		225		86	80	54	45	44	37	4	2	1	57	57	27	5	5	0	-	-	-	197	188	119	78	77	56	34	32	28	-
(%)		35.1111			24.8889			0.888889			32			7.11111		-	-	-					42.5532			23.4043			1.06383			30.3191			2.65957		-	-	-					37.561			15.6098		-
-3.16	122	121	75	20	20	12	10	9	9	33	32	10	17	17	0	-	-	-		199		100	98	63	28	28	27	0	0	0	15	14	2	19	19	2	-	-	-	162	159	94	78	77	50	18	18	16	-
(%)		60.804			10.0503			4.52261			16.0804			8.54271		-	-	-					61.6352			17.6101			0			8.80503			11.9497		-	-	-					38.8889			9.09091		-
-3.08	58	57	35	25	25	14	-	-	-	56	53	8	10	10	0	-	-	-		145		104	100	52	33	32	28	-	-	-	13	13	2	10	10	2	-	-	-	160	155	84	126	126	53	32	32	19	-
(%)		39.3103			17.2414		-	-	-		36.5517			6.89655		-	-	-					64.5161			20.6452		-	-	-		8.3871			6.45161		-	-	-					37.5			9.52381		-
-2.92	45	44	32	-	-	-	-	-	-	26	26	5	3	3	1	-	-	-		73		80	80	51	-	-	-	-	-	-	75	72	21	9	9	1	-	-	-	164	161	73	109	106	63	-	-	-	-
(%)		60.274		-	-	-	-	-	-		35.6164			4.10959		-	-	-					49.6894		-	-	-	-	-	-		44.7205			5.59006		-	-	-					45.1064		-	-	-	-
-2.8	16	16	8	-	-	-	-	-	-	24	24	0	-	-	-	-	-	-		40		26	26	22	-	-	-	-	-	-	12	12	6	4	4	1	-	-	-	42	42	29	41	41	26	-	-	-	-
(%)		40		-	-	-	-	-	-		60		-	-	-	-	-	-					61.9048		-	-	-	-	-	-		28.5714			9.52381		-	-	-					59.4203		-	-	-	-
all	768	752	444	181	179	126	29	22	17	408	403	62	115	115	1	196	196	94	1697	1666	744	702	682	447	167	164	145	12	9	7	238	234	78	119	119	17	193	192	81	1431	1400	775	738	729	414	119	117	88
of all TH+ (%)		45.1381			10.7443			1.32053			24.1897			6.90276			11.7647			100			48.7143			11.7143			0.642857			16.7143			8.5			13.7143			100			37.0051			5.93909
TH+(%)		97.9167			98.895			75.8621			98.7745			100			100			98.1732			97.151			98.2036			75			98.3193			100			99.4819			97.8337			98.7805			98.3193
CB+(%)		59.0426			70.3911			77.2727			15.3846			0.869565			47.9592			44.6579			65.5425			88.4146			77.7778			33.3333			14.2857			42.1875			55.3571			56.7901			75.2137
[truncated: 35 more columns]
