# Supplementary material for: In vivo functional diversity of midbrain dopamine neurons within identified axonal projections
Source: eLife. 2019 Oct 3;8:e48408. doi: 10.7554/eLife.48408 (PMC6791716; doi:10.7554/eLife.48408)
Supplement: Figure 5—source data 1. — DA neurons counted in caudal, intermediate and rostral sections (N = 3 animals for each comparison). [file elife-48408-fig5-data1.xlsx]

## Sheet: Tabelle1
Source Data - Double Labelling
														DMS vs DLS			DLS RB
					1								2								3								all
	all RB	RB single	all FG	FG single	double	of RB (%)	of FG (%)	of all (%)	all RB	RB single	all FG	FG single	double	of RB (%)	of FG (%)	of all (%)	all RB	RB single	all FG	FG single	double	of RB (%)	of FG (%)	of all (%)	all RB	RB single	all FG	FG single	double	of RB (%)	of FG (%)	of all (%)
caudal	34	18	86	70	16	47.0588	18.6047	15.3846	58	44	62	48	14	24.1379	22.5806	13.2075	35	25	53	43	10	28.5714	18.8679	12.8205	127	87	201	161	40	31.4961	19.9005	13.8889
intermediate	13	4	86	77	9	69.2308	10.4651	10	28	13	81	66	15	53.5714	18.5185	15.9574	23	20	64	61	3	13.0435	4.6875	3.57143	64	37	231	204	27	42.1875	11.6883	10.0746
rostral	32	17	66	51	15	46.875	22.7273	18.0723	70	44	79	53	26	37.1429	32.9114	21.1382	41	29	68	56	12	29.2683	17.6471	12.3711	143	90	213	160	53	37.0629	24.8826	17.4917
	79	39	238	198	40	50.6329	16.8067	14.4404	156	101	222	167	55	35.2564	24.7748	17.0279	99	74	185	160	25	25.2525	13.5135	9.65251	334	214	645	525	120	35.9281	18.6047	13.9697
														lNAcc vs DLS			DLS RB
					1								2								3								all
	all RB	RB single	all FG	FG single	double	of RB (%)	of FG (%)	of all (%)	all RB	RB single	all FG	FG single	double	of RB (%)	of FG (%)	of all (%)	all RB	RB single	all FG	FG single	double	of RB (%)	of FG (%)	of all (%)	all RB	RB single	all FG	FG single	double	of RB (%)	of FG (%)	of all (%)
caudal	20	15	21	16	5	25	23.8095	13.8889	12	10	32	30	2	16.6667	6.25	4.7619	25	20	40	35	5	27.7778	15.1515	8.33333	50	38	86	74	12	24	13.9535	9.67742
intermediate	12	9	33	30	3	25	9.09091	7.14286	16	12	46	42	4	25	8.69565	6.89655	13	9	27	23	4	30.7692	14.8148	11.1111	41	30	106	95	11	26.8293	10.3774	8.08824
rostral	31	20	28	17	11	35.4839	39.2857	22.9167	29	23	25	19	6	20.6897	24	12.5	18	13	33	28	5	27.7778	15.1515	10.8696	78	56	86	64	22	28.2051	25.5814	15.493
	63	44	82	63	19	30.1587	23.1707	15.0794	57	45	103	91	12	21.0526	11.6505	8.10811	56	42	100	86	14	25	14	9.85915	169	124	278	233	45	26.6272	16.1871	11.194
														lNAcc vs mNAcc			lNAcc RB
					1								2								3								all
	all RB	RB single	all FG	FG single	double	of RB (%)	of FG (%)	of all (%)	all RB	RB single	all FG	FG single	double	of RB (%)	of FG (%)	of all (%)	all RB	RB single	all FG	FG single	double	of RB (%)	of FG (%)	of all (%)	all RB	RB single	all FG	FG single	double	of RB (%)	of FG (%)	of all (%)
caudal	34	31	106	103	3	8.82353	2.83019	2.18978	61	52	135	126	9	14.7541	6.66667	4.81283	46	40	41	35	6	13.0435	14.6341	7.40741	141	123	282	264	18	12.766	6.38298	4.44444
intermediate	47	44	103	100	3	6.38298	2.91262	2.04082	50	41	118	109	9	18	7.62712	5.66038	26	20	92	86	6	23.0769	6.52174	5.35714	123	105	313	295	18	14.6341	5.7508	4.30622
rostral	58	54	68	64	4	6.89655	5.88235	3.27869	64	57	54	47	7	10.9375	12.963	6.30631	44	39	72	67	5	11.3636	6.94444	4.5045	166	150	194	178	16	9.63855	8.24742	4.65116
	139	129	277	267	10	7.19424	3.61011	2.46305	175	150	307	282	25	14.2857	8.14332	5.47046	116	99	205	188	17	14.6552	8.29268	5.59211	430	378	789	737	52	12.093	6.59062	4.45587
