# Supplementary material for: In vivo functional diversity of midbrain dopamine neurons within identified axonal projections
Source: eLife journal article supplement (doi:10.7554/elife.48408), 2019-10-03
Supplement: supp [file elife-48408-supp-v1.zip]

Figure 1 - figure supplement 1

A

FG-labeling detection (intrinsic FG signal)

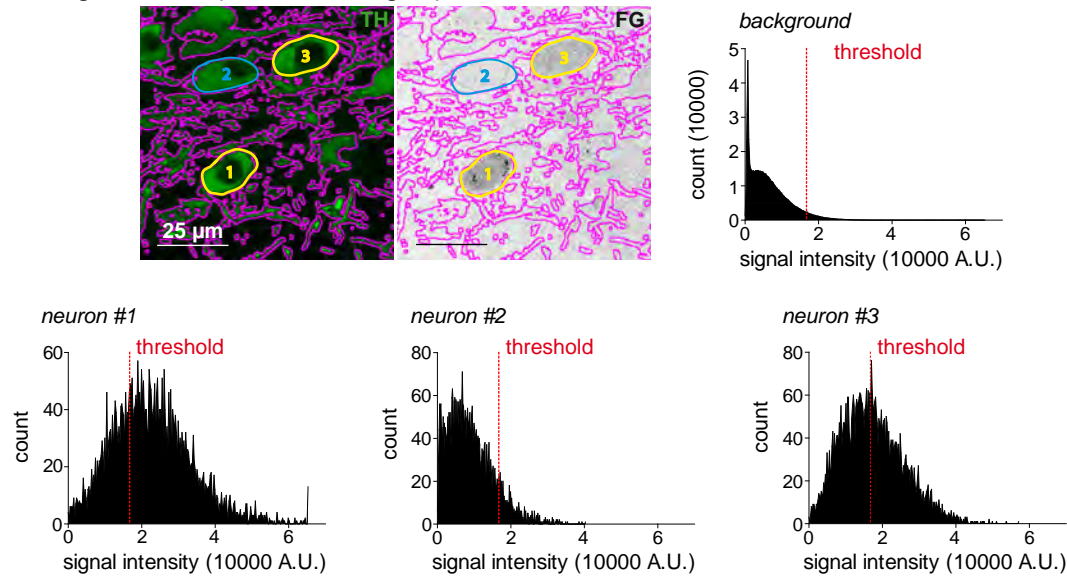

| TH neuron # | mean (TH+ neuron) | mean (TH-free BG) | BG SD | threshold | FG-labelled? |
|-------------|-------------------|-------------------|-------|-----------|--------------|
| 1           | 22899             | 6704              | 5013  | 16730     | ✓            |
| 2           | 9119              | 6704              | 5013  | 16730     | ✗            |
| 3           | 17385             | 6704              | 5013  | 16730     | ✓            |

B

FG-labeling detection (FG-Antibody)

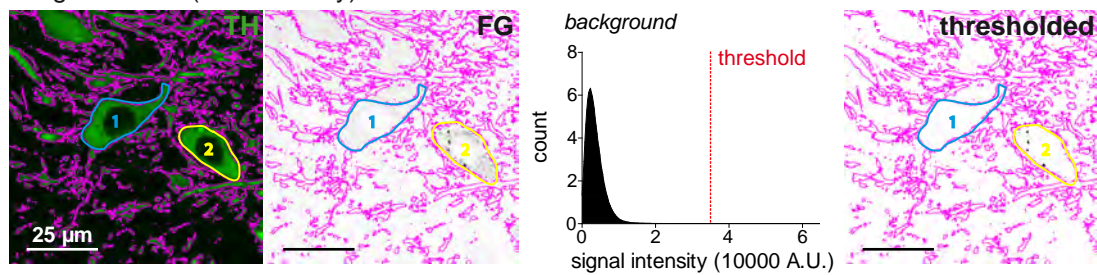

| TH neuron # | mean (TH-free BG) | BG SD | threshold | positive marks | FG-labelled? |
|-------------|-------------------|-------|-----------|----------------|--------------|
| 1           | 3720              | 3037  | 34973     | 0              | ✗            |
| 2           | 3720              | 3037  | 34973     | >5             | ✓            |
