# Supplementary material for: In vivo functional diversity of midbrain dopamine neurons within identified axonal projections
Source: eLife journal article supplement (doi:10.7554/elife.48408), 2019-10-03
Supplement: supp [file elife_poa_e48408_Figure_4_source_data_5.xls]

## Sheet: Tabelle1
Source Data - Anatomical Reconstruction - mNAcc
											mNAcc 1																					mNAcc 2
Bregma (mm)		PBP			PN			IF			mSN			lSN			RRF			all			PBP			PN			IF			mSN			lSN			RRF			all (of TH+/FG+)			PBP			PN
	FG+	TH+/FG+	CB+/TH+/FG+	FG+	TH+/FG+	CB+/TH+/FG+	FG+	TH+/FG+	CB+/TH+/FG+	FG+	TH+/FG+	CB+/TH+/FG+	FG+	TH+/FG+	CB+/TH+/FG+	FG+	TH+/FG+	CB+/TH+/FG+	FG+	TH+/FG+	CB+/TH+/FG+	FG+	TH+/FG+	CB+/TH+/FG+	FG+	TH+/FG+	CB+/TH+/FG+	FG+	TH+/FG+	CB+/TH+/FG+	FG+	TH+/FG+	CB+/TH+/FG+	FG+	TH+/FG+	CB+/TH+/FG+	FG+	TH+/FG+	CB+/TH+/FG+	FG+	TH+/FG+	CB+/TH+/FG+	FG+	TH+/FG+	CB+/TH+/FG+	FG+	TH+/FG+	CB+/TH+/FG+	FG+
-4.16	-	-	-	-	-	-	-	-	-	-	-	-	-	-	-	2	1	1		1		-	-	-	-	-	-	-	-	-	-	-	-	-	-	-	-	-	-	-	-	-	-	-	-	-	-	-	-
(%)	-	-	-	-	-	-	-	-	-	-	-	-	-	-	-		100					-	-	-	-	-	-	-	-	-	-	-	-	-	-	-	-	-	-	-	-	-	-	-	-	-	-	-	-
-4.04	-	-	-	-	-	-	-	-	-	-	-	-	-	-	-	4	4	4		4		-	-	-	-	-	-	-	-	-	-	-	-	-	-	-	8	5	5		5		-	-	-	-	-	-	-
%	-	-	-	-	-	-	-	-	-	-	-	-	-	-	-		100					-	-	-	-	-	-	-	-	-	-	-	-	-	-	-		100					-	-	-	-	-	-	-
-3.88	9	9	6	-	-	-	-	-	-	-	-	-	-	-	-	14	13	10		22		11	11	8	-	-	-	-	-	-	-	-	-	-	-	-	21	21	17		32		6	6	4	-	-	-	-
(%)		40.9091		-	-	-	-	-	-	-	-	-	-	-	-		59.0909						34.375		-	-	-	-	-	-	-	-	-	-	-	-		65.625						40		-	-	-	-
3.64	51	49	35	42	42	37	37	29	27	4	4	4	-	-	-	-	-	-		124		33	32	26	81	77	74	38	37	36	2	2	1	-	-	-	-	-	-		148		29	29	28	50	50	47	19
(%)		39.5161			33.871			23.3871			3.22581		-	-	-	-	-	-					21.6216			52.027			25			1.35135		-	-	-	-	-	-					29			50
-3.52	68	66	51	68	66	63	37	33	33	14	14	12	-	-	-	-	-	-		179		58	56	51	77	76	74	49	46	44	30	30	27	-	-	-	-	-	-		208		37	37	26	80	79	71	29
(%)		36.8715			36.8715			18.4358			7.82123		-	-	-	-	-	-					26.9231			36.5385			22.1154			14.4231		-	-	-	-	-	-					23.7179			50.641
-3.4	53	50	31	164	156	148	19	18	15	51	49	44	-	-	-	-	-	-		273		29	29	25	122	116	110	38	36	34	56	55	46	-	-	-	-	-	-		236		13	13	8	135	131	118	36
(%)		18.315			57.1429			6.59341			17.9487		-	-	-	-	-	-					12.2881			49.1525			15.2542			23.3051		-	-	-	-	-	-					6.10329			61.5023
-3.28	11	11	6	111	100	88	32	31	25	38	35	28	-	-	-	-	-	-		177		23	22	21	81	80	79	19	16	15	33	32	29	1	1	1	-	-	-		151		5	5	2	76	75	64	14
(%)		6.21469			56.4972			17.5141			19.774		-	-	-	-	-	-					14.5695			52.9801			10.596			21.1921			0.662252		-	-	-					3.78788			56.8182
-3.16	11	11	7	78	78	69	38	37	34	8	8	7	-	-	-	-	-	-		134		15	15	13	51	50	46	26	23	18	15	15	13	2	2	2	-	-	-		105		3	3	2	46	46	38	23
(%)		8.20896			58.209			27.6119			5.97015		-	-	-	-	-	-					14.2857			47.619			21.9048			14.2857			1.90476		-	-	-					3.75			57.5
-3.08	4	3	3	61	57	44	5	5	2	4	4	4	-	-	-	-	-	-		69		16	16	15	29	29	26	-	-	-	7	7	7	2	2	2	-	-	-		54		4	4	3	59	58	40	-
(%)		4.34783			82.6087			7.24638			5.7971		-	-	-	-	-	-					29.6296			53.7037		-	-	-		12.963			3.7037		-	-	-					5.55556			80.5556		-
-2.92	6	6	6	-	-	-	-	-	-	6	6	5	-	-	-	-	-	-		12		13	12	12	-	-	-	-	-	-	3	2	2	-	-	-	-	-	-		14		11	11	10	-	-	-	-
(%)		50		-	-	-	-	-	-		50		-	-	-	-	-	-					85.7143		-	-	-	-	-	-		14.2857		-	-	-	-	-	-					73.3333		-	-	-	-
-2.8	-	-	-	-	-	-	-	-	-	-	-	-	-	-	-	-	-	-				2	2	2	-	-	-	-	-	-	-	-	-	-	-	-	-	-	-		2		2	2	2	-	-	-	-
(%)	-	-	-	-	-	-	-	-	-	-	-	-	-	-	-	-	-	-					100		-	-	-	-	-	-	-	-	-	-	-	-	-	-	-					100		-	-	-	-
all	213	205	145	524	499	449	168	153	136	125	120	99	-	-	-	20	18	15	1050	995	844	200	195	173	441	428	409	170	158	147	146	143	125	5	5	5	26	26	26	988	955	885	110	110	85	446	439	378	121
of all TH+ (%)		20.603			50.1508			15.3769			12.0603		-	-	-		1.80905			100			20.4188			44.8168			16.5445			14.9738			0.52356			2.72251			100			13.9417			55.6401
TH+(%)		96.2441			95.229			91.0714			96						90			94.7619			97.5			97.0522			92.9412			97.9452			100			100			96.6599			100			98.4305
CB+(%)		70.7317			89.98			88.8889			82.5						83.3333			84.8241			88.7179			95.5607			93.038			87.4126			100			100			92.6702			77.2727			86.1048
[truncated: 35 more columns]
