# Supplementary figures and images for: In vivo functional diversity of midbrain dopamine neurons within identified axonal projections
Source: eLife journal article supplement (doi:10.7554/elife.48408), 2019-10-03

Figure 6 - figure supplement 1

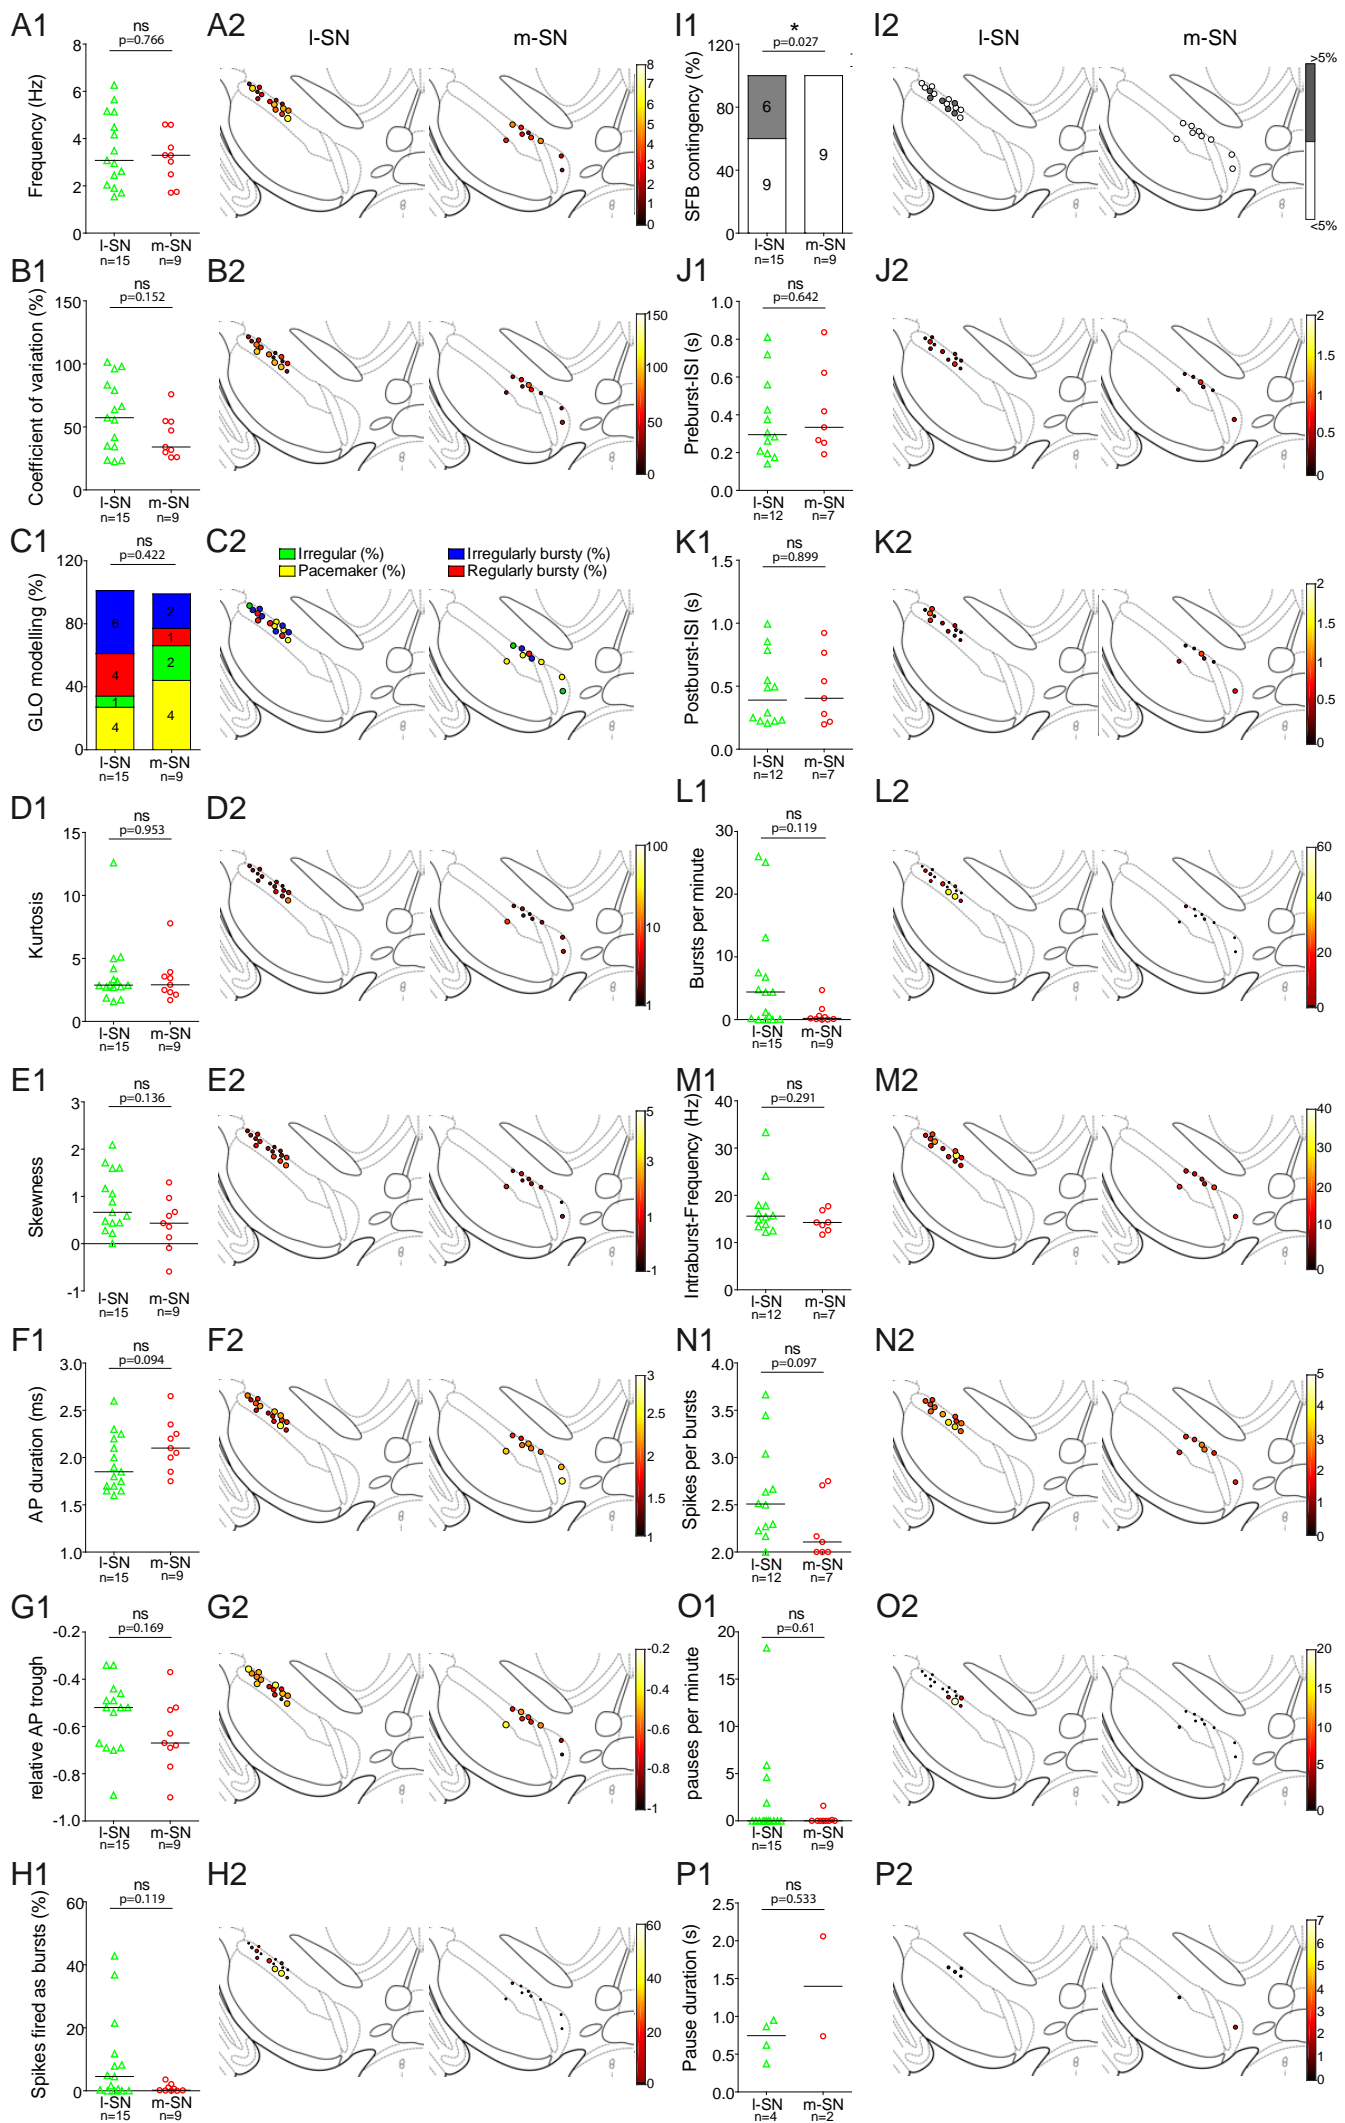

Supplement: supp [file elife-48408-supp-v1.zip]

Figure 7 - figure supplement 1

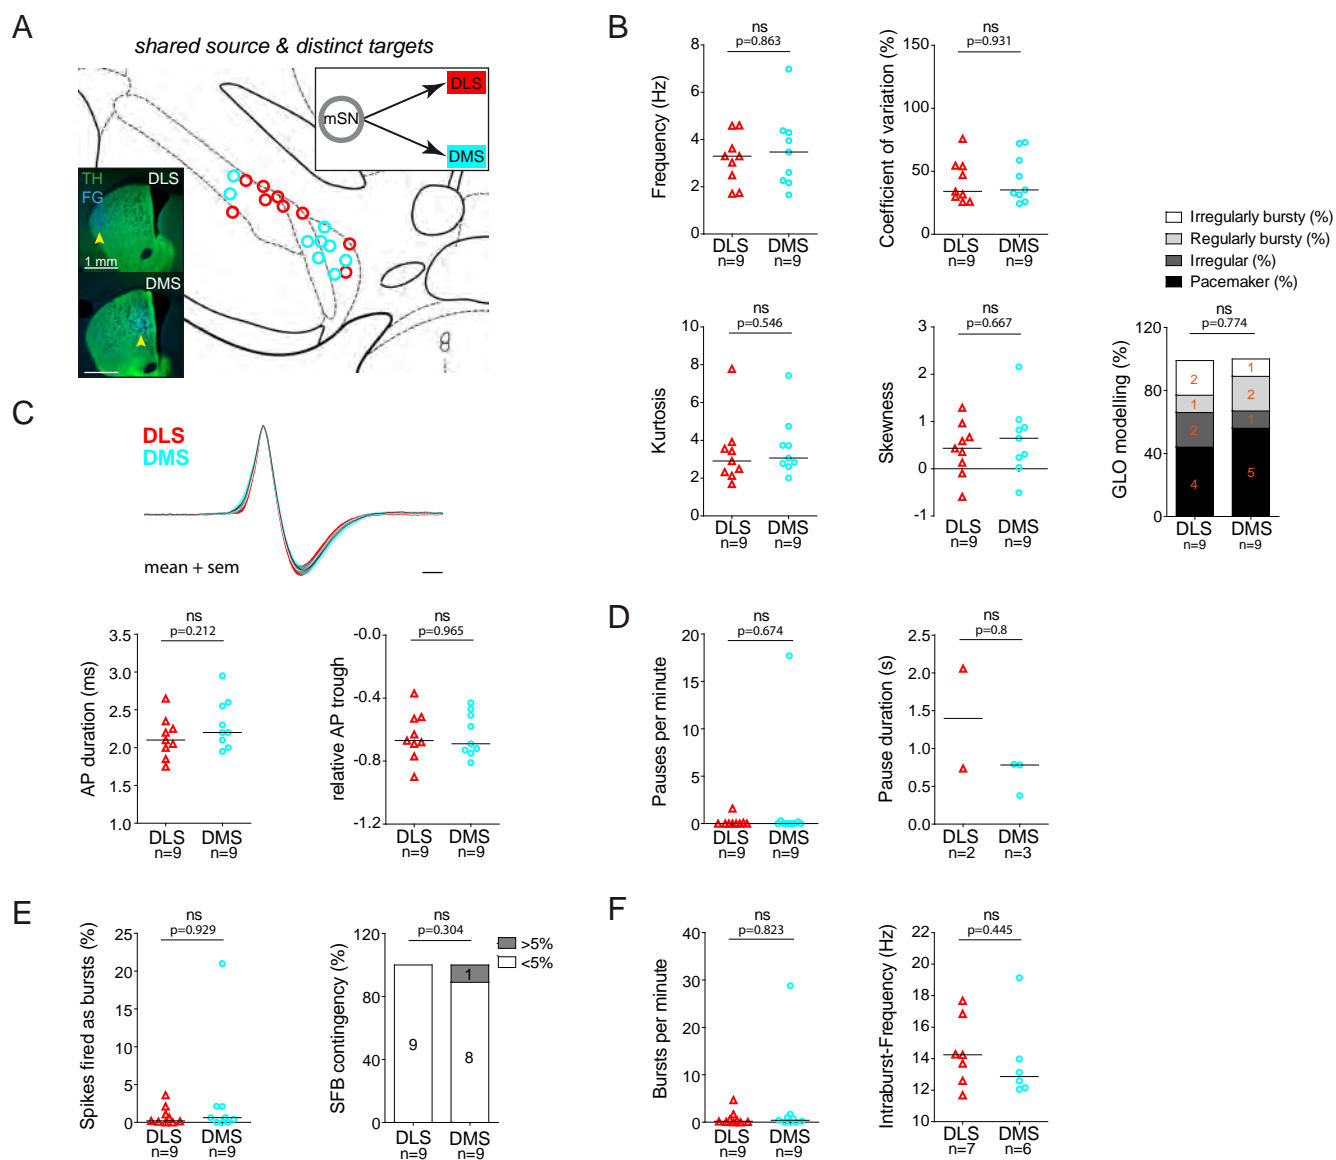

Supplement: supp [file elife-48408-supp-v1.zip]

Figure 4 - figure supplement 2

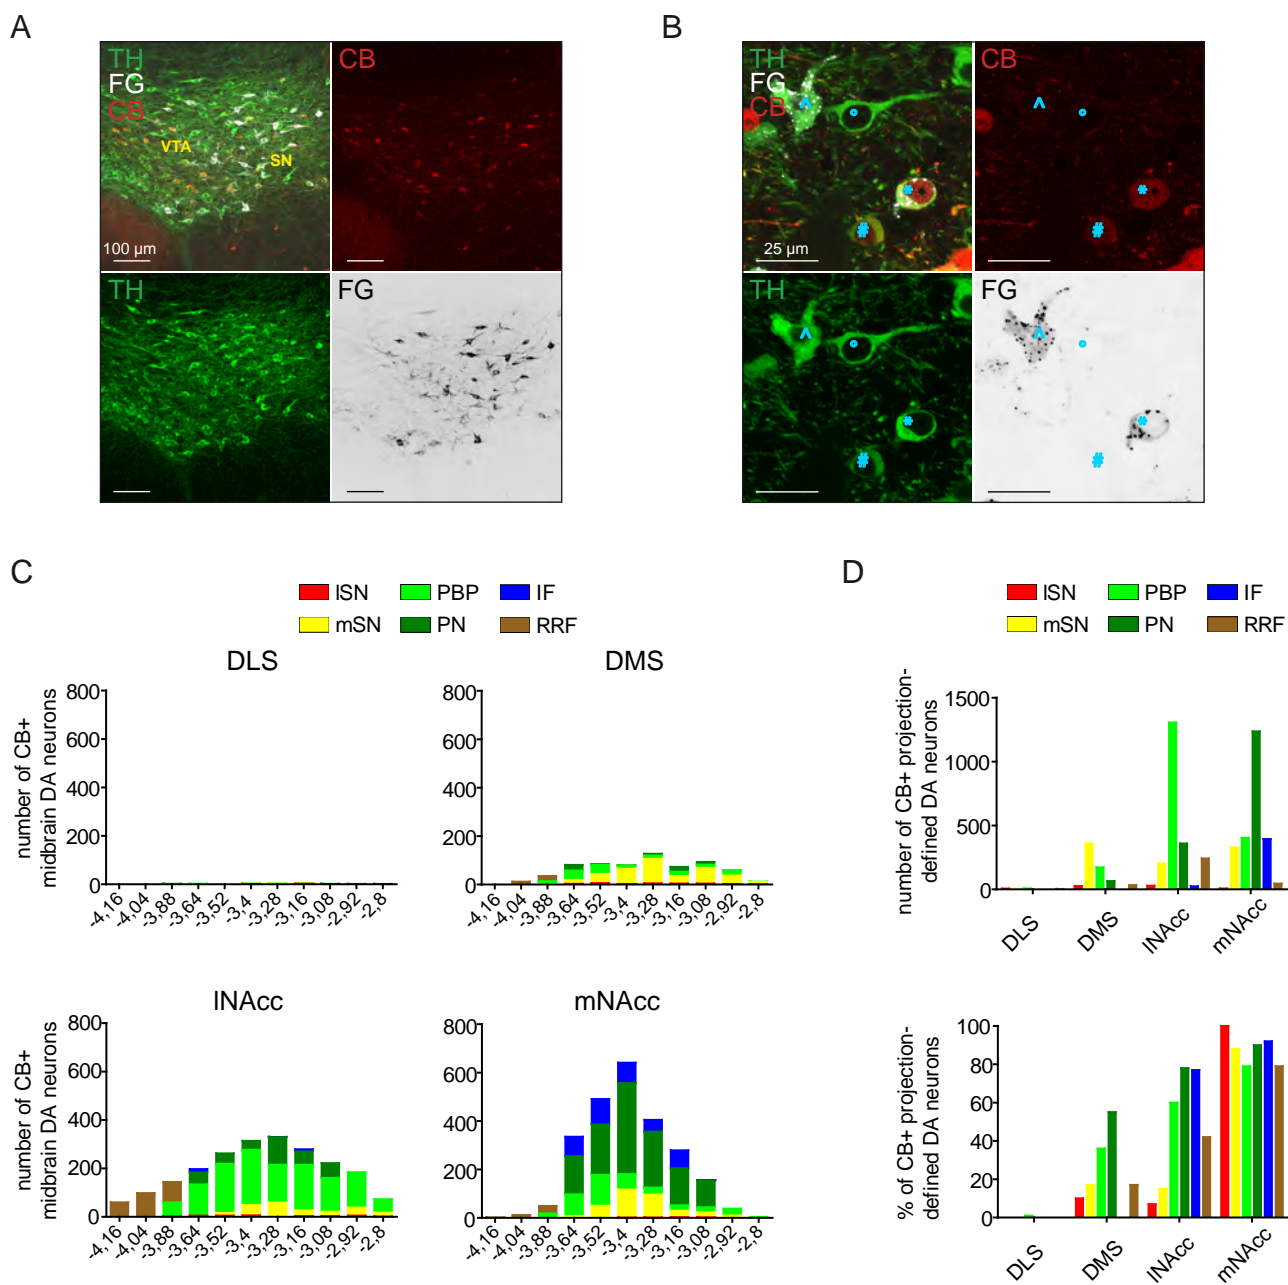

Supplement: supp [file elife-48408-supp-v1.zip]

Figure 4 - figure supplement 4

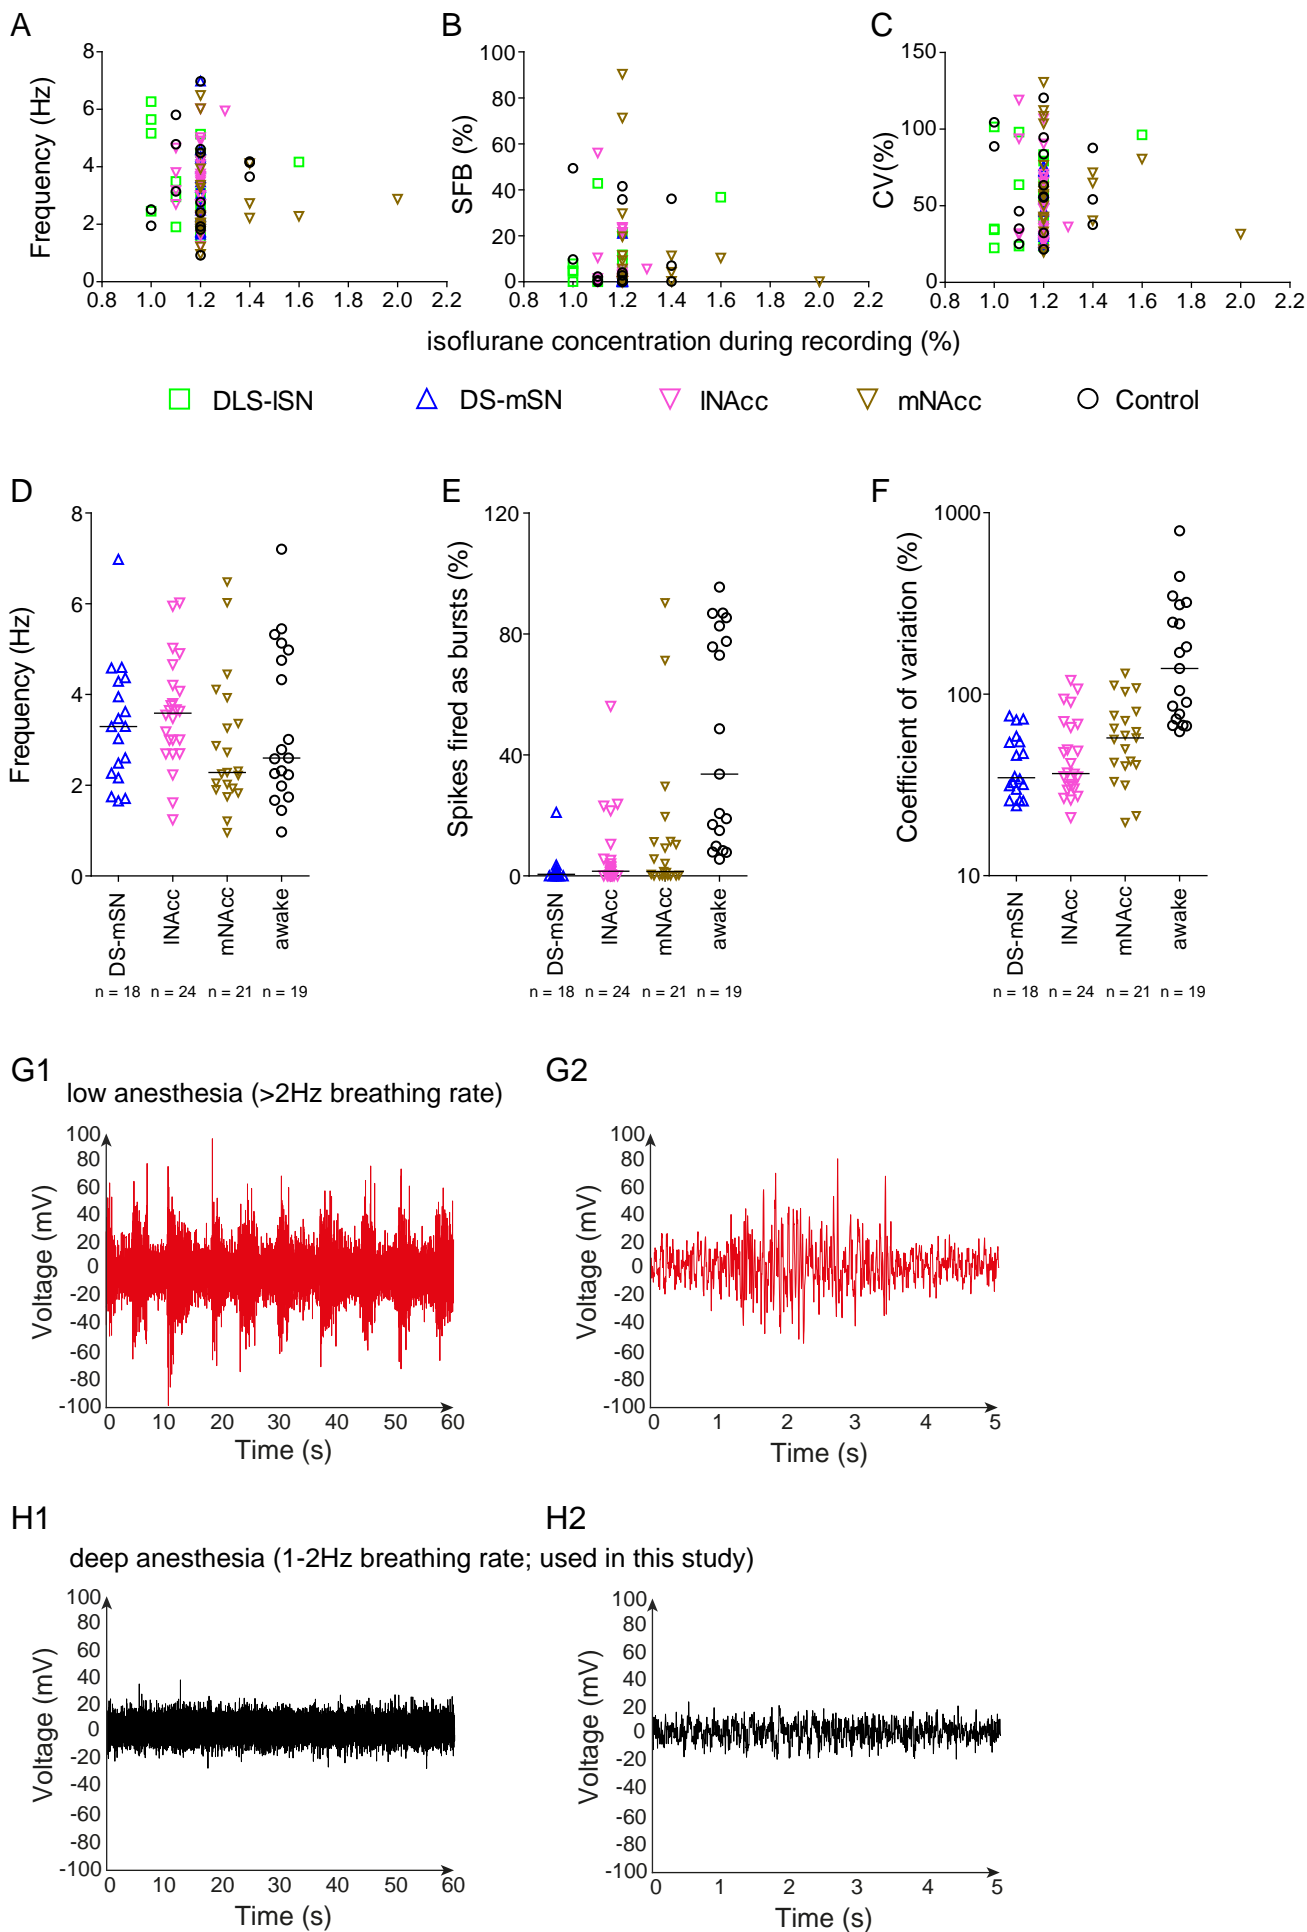

Supplement: supp [file elife-48408-supp-v1.zip]

Figure 7 - figure supplement 3

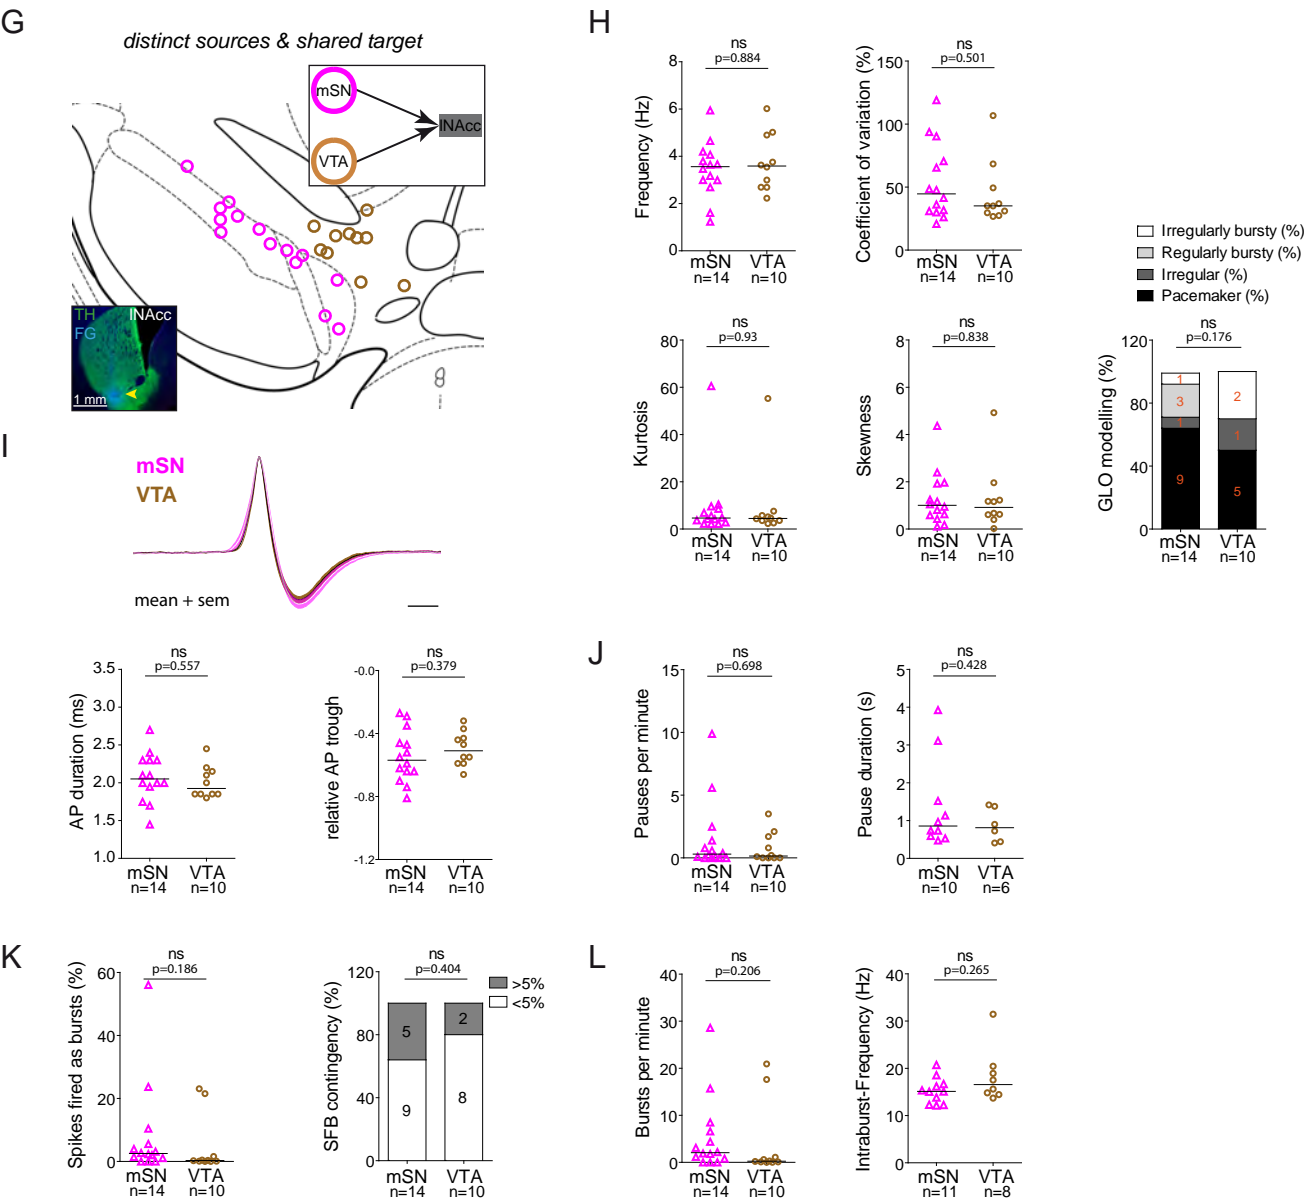

Supplement: supp [file elife-48408-supp-v1.zip]

Figure 7 - figure supplement 2

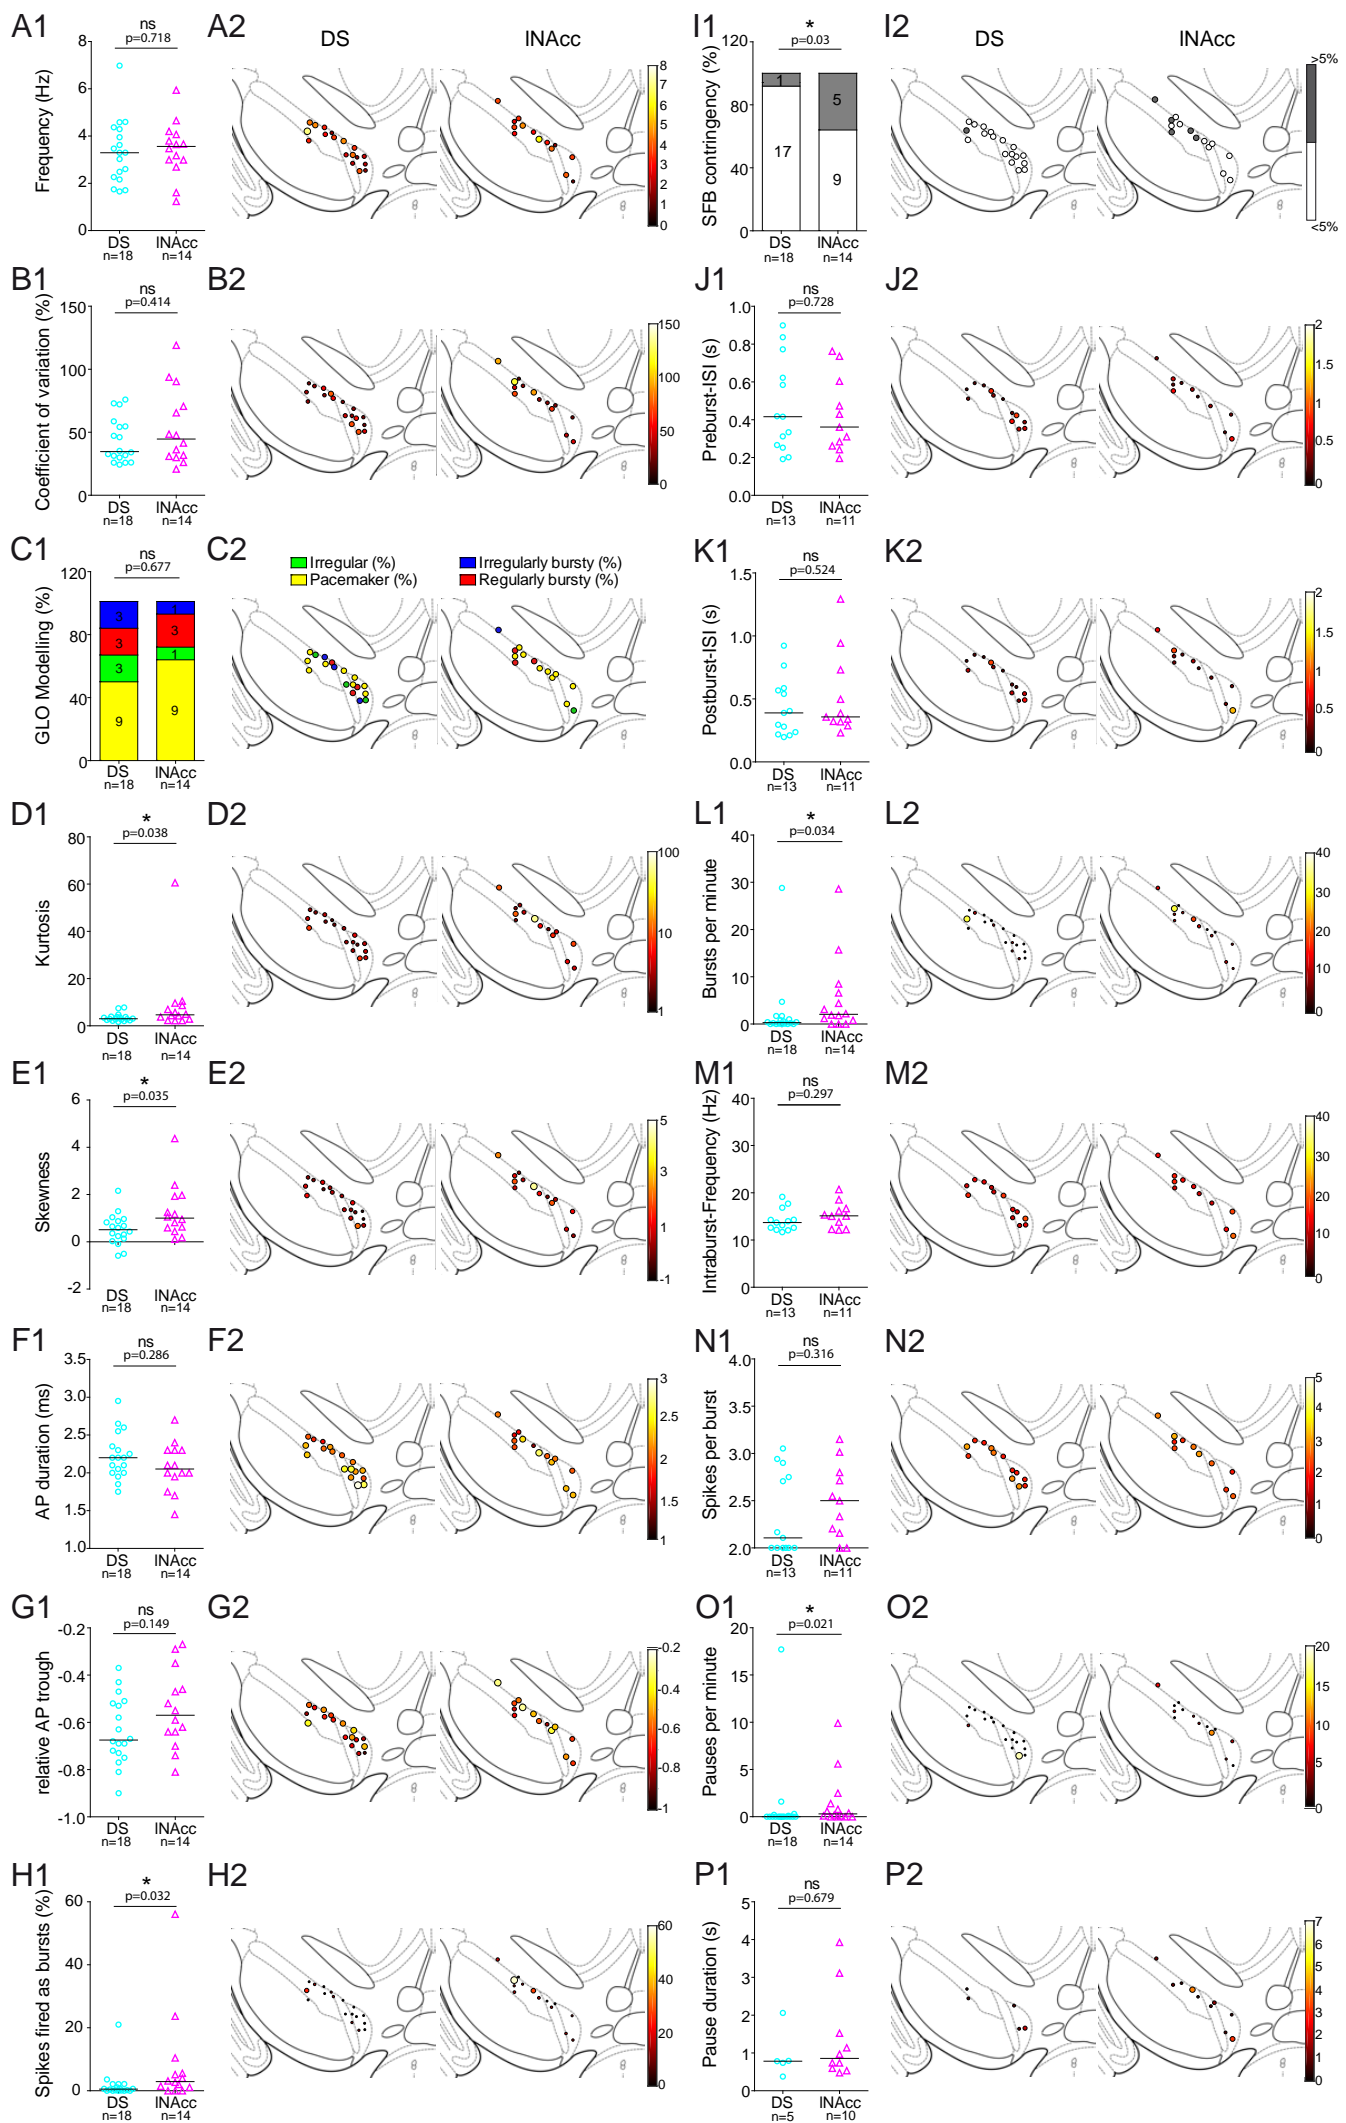

Supplement: supp [file elife-48408-supp-v1.zip]

Figure 8 - figure supplement 1

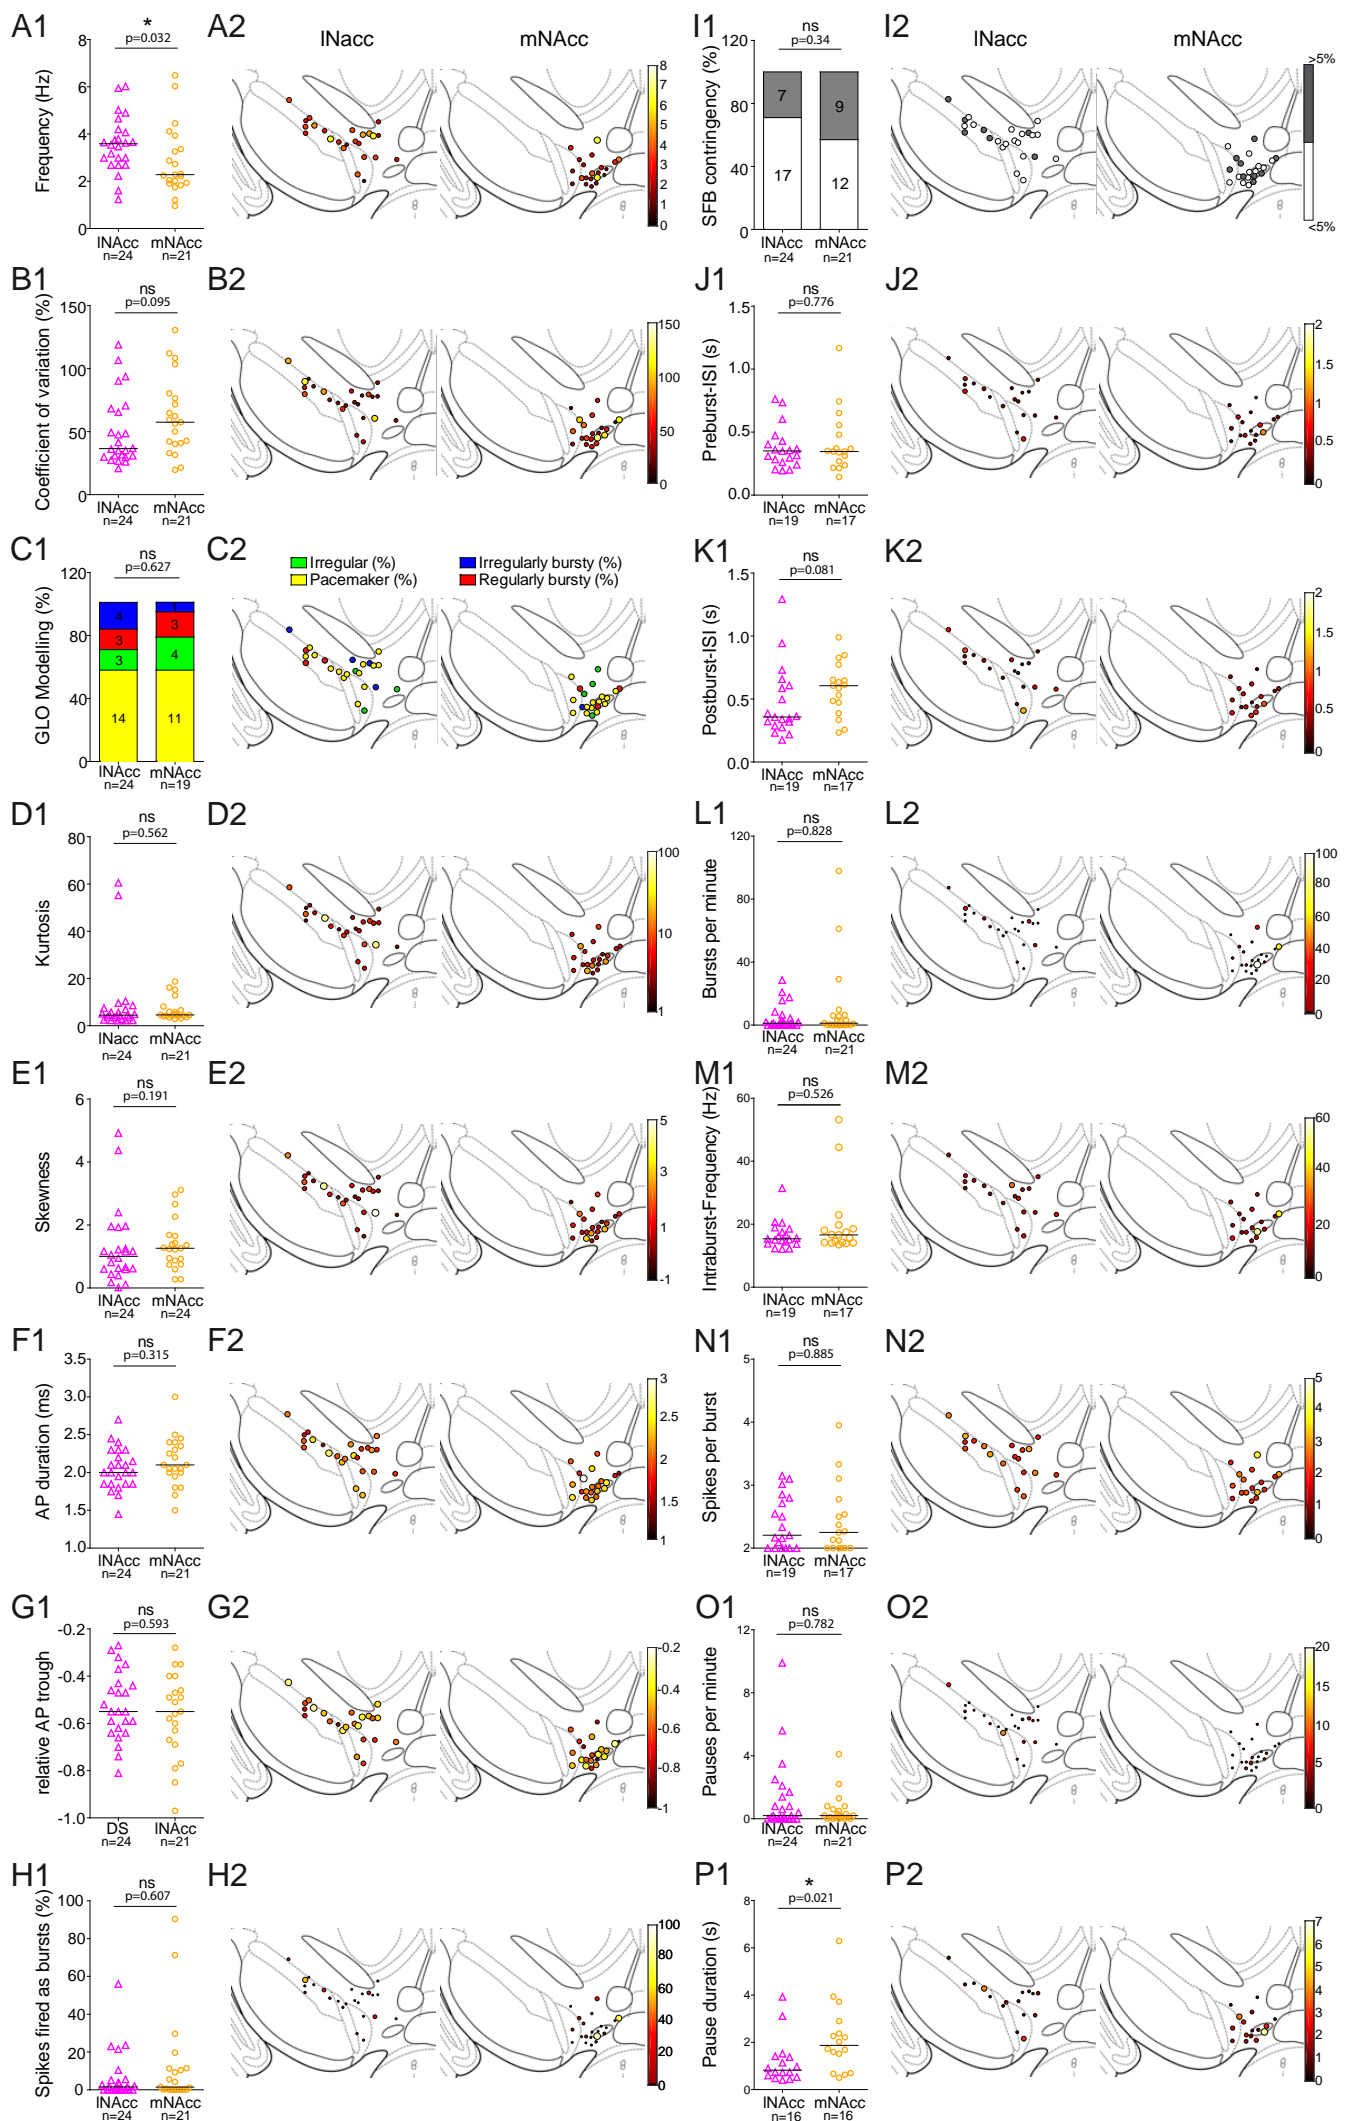

Supplement: supp [file elife-48408-supp-v1.zip]

Figure 8 - figure supplement 2

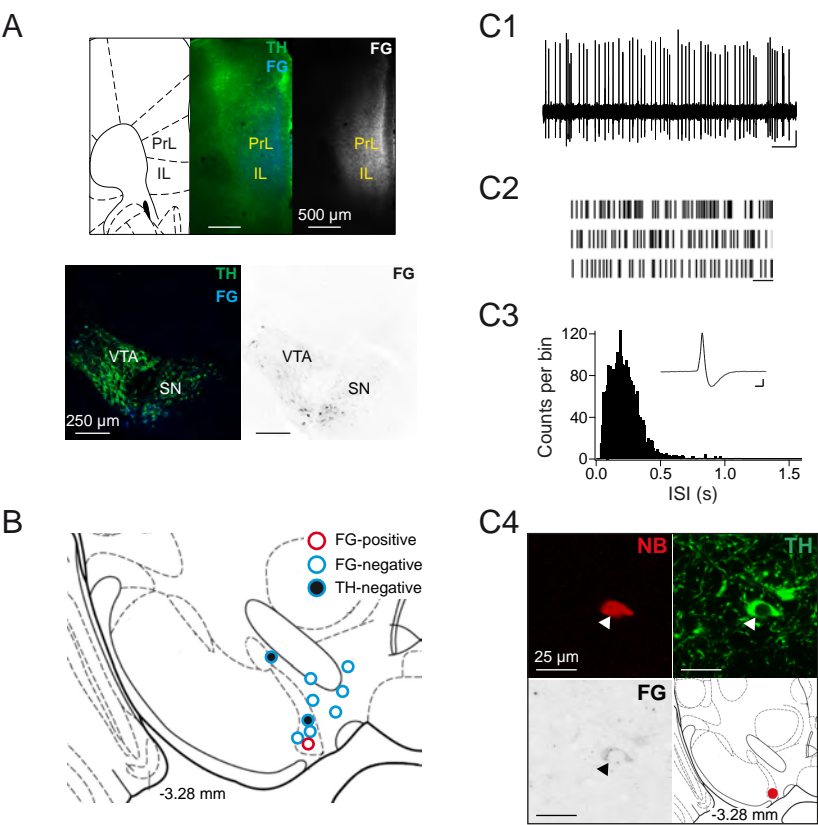

Supplement: supp [file elife-48408-supp-v1.zip]

Figure 4 - figure supplement 3

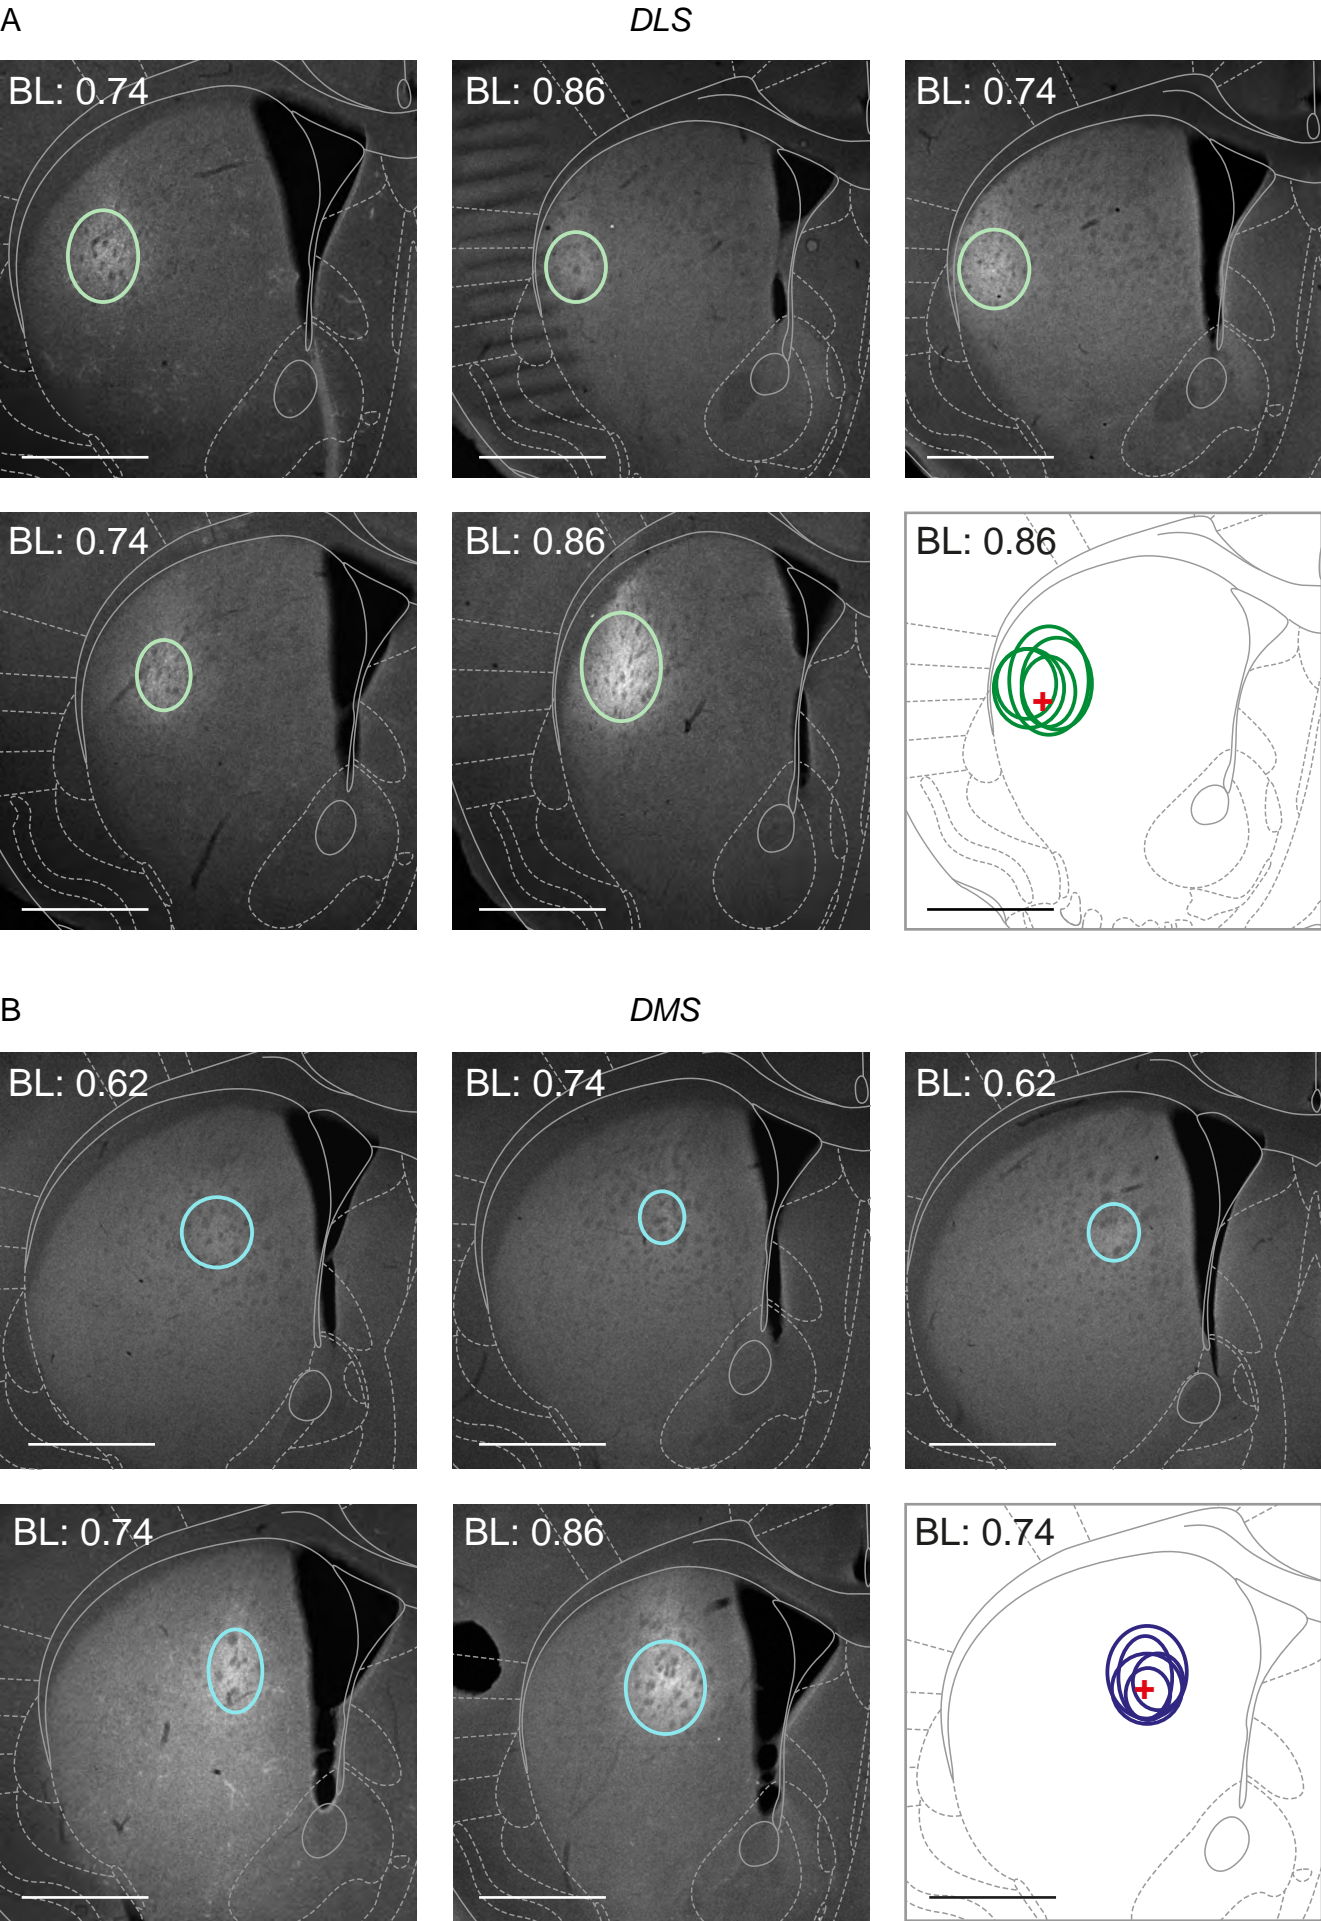

C

*INAcc*

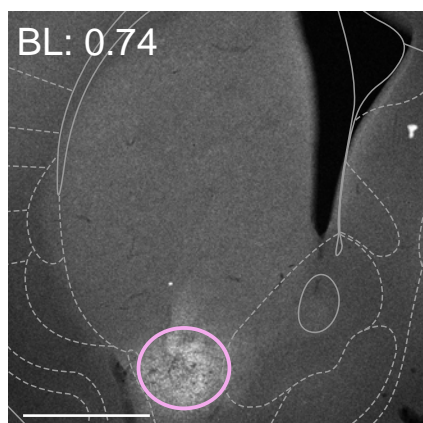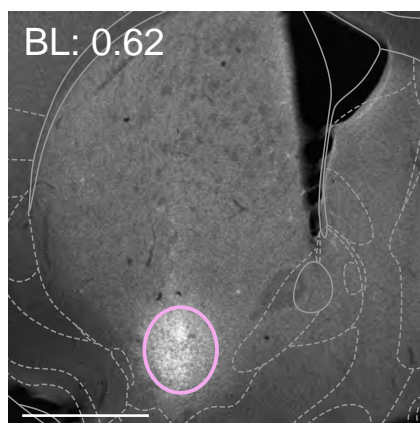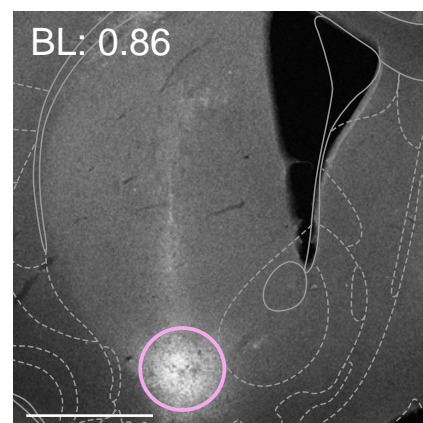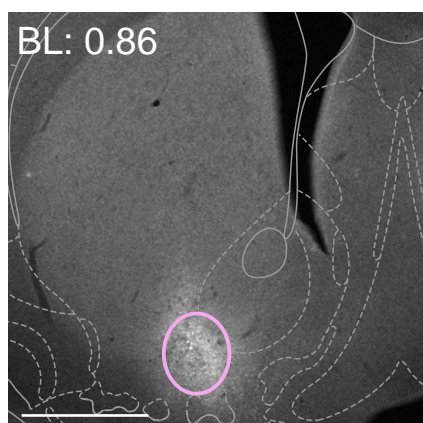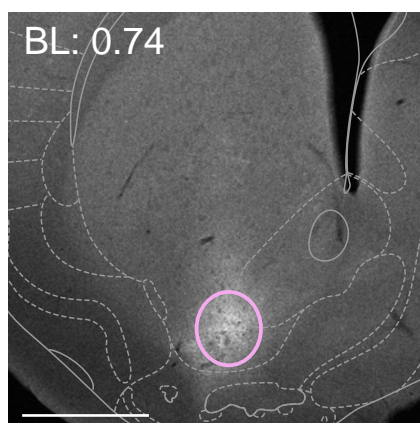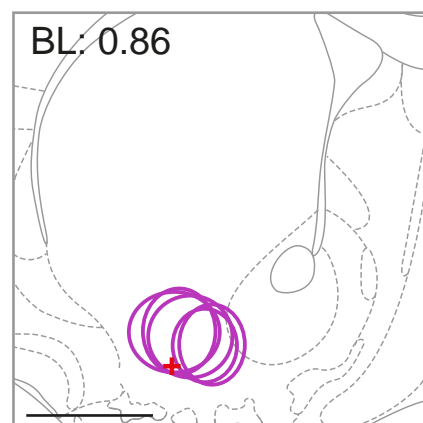

D

*mNAcc*

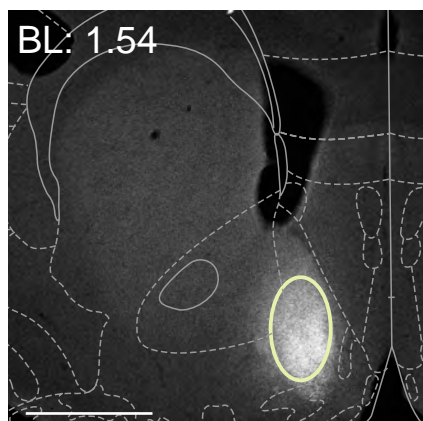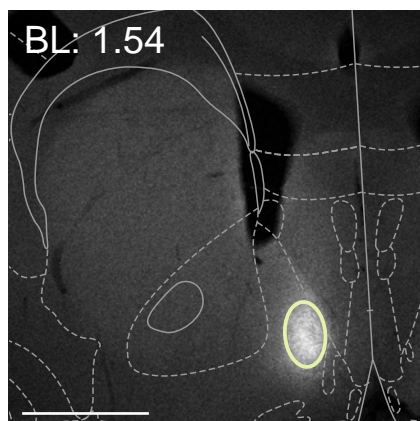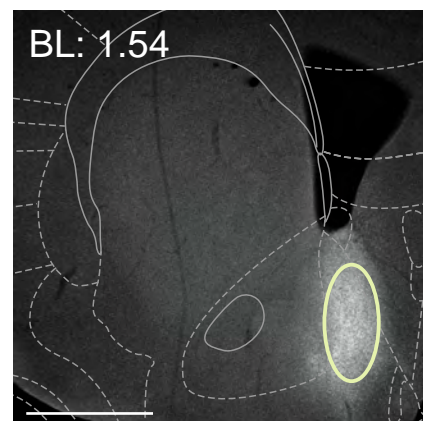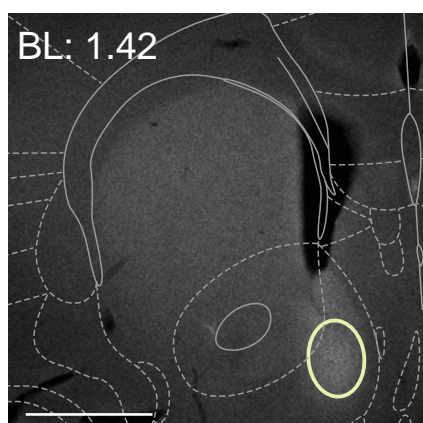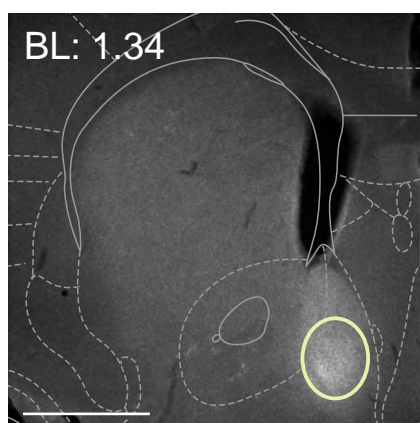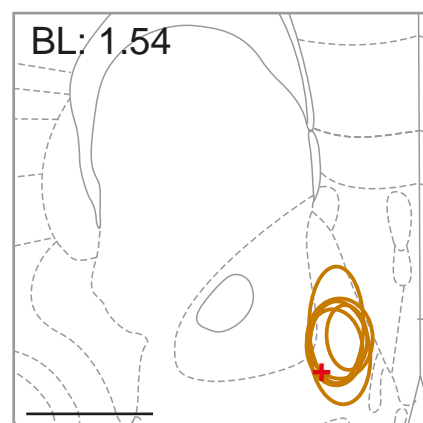

Supplement: supp [file elife-48408-supp-v1.zip]

Figure 3 - figure supplement 1

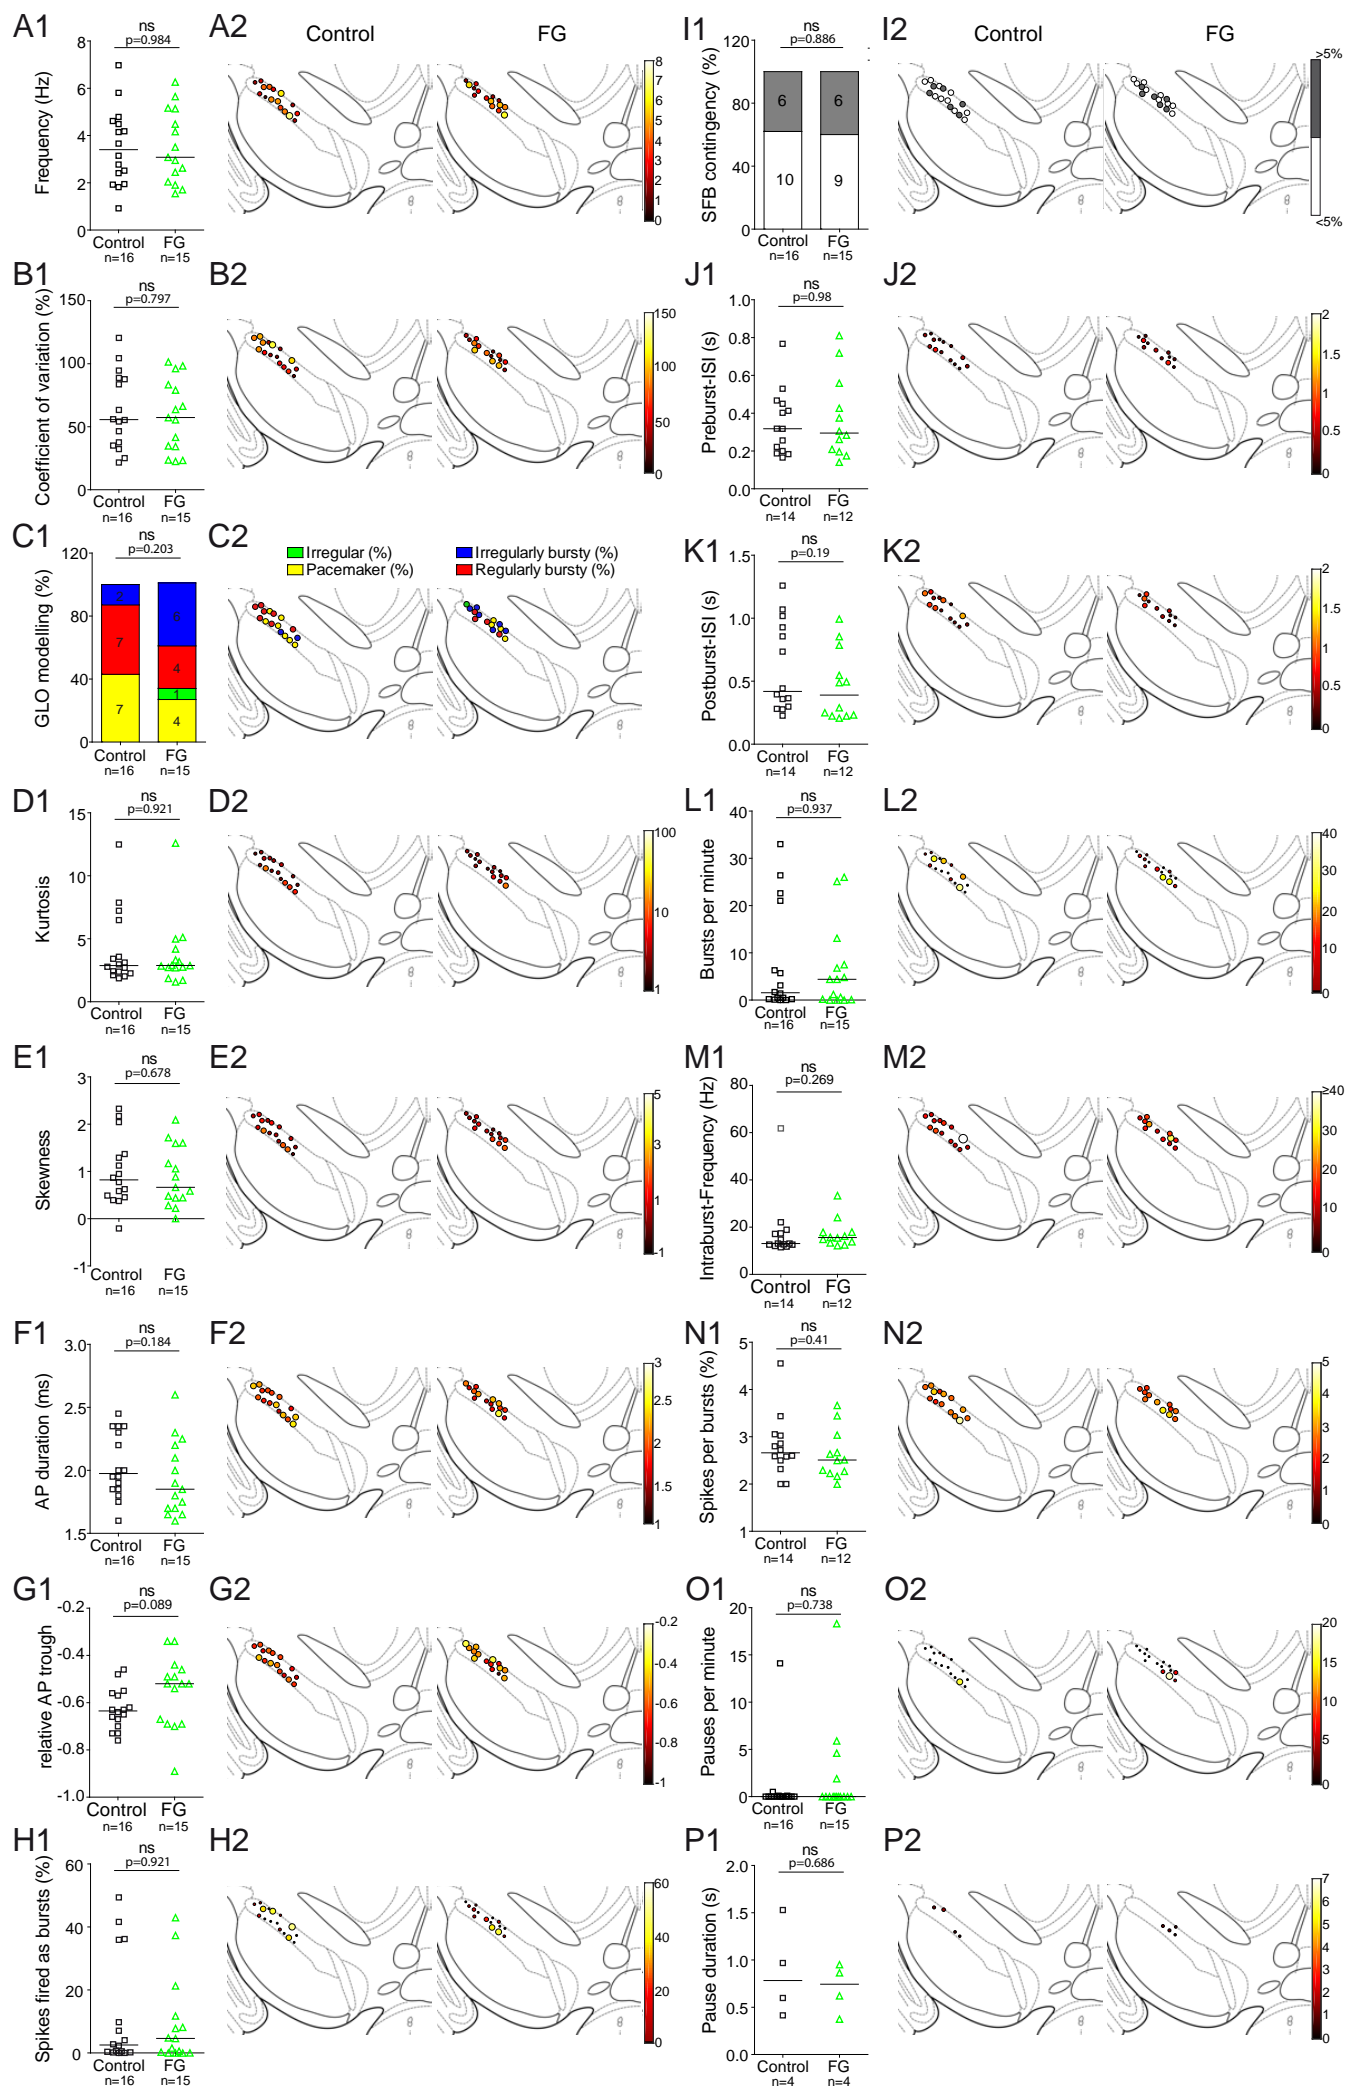

Supplement: supp [file elife-48408-supp-v1.zip]

Figure 4 - figure supplement 1

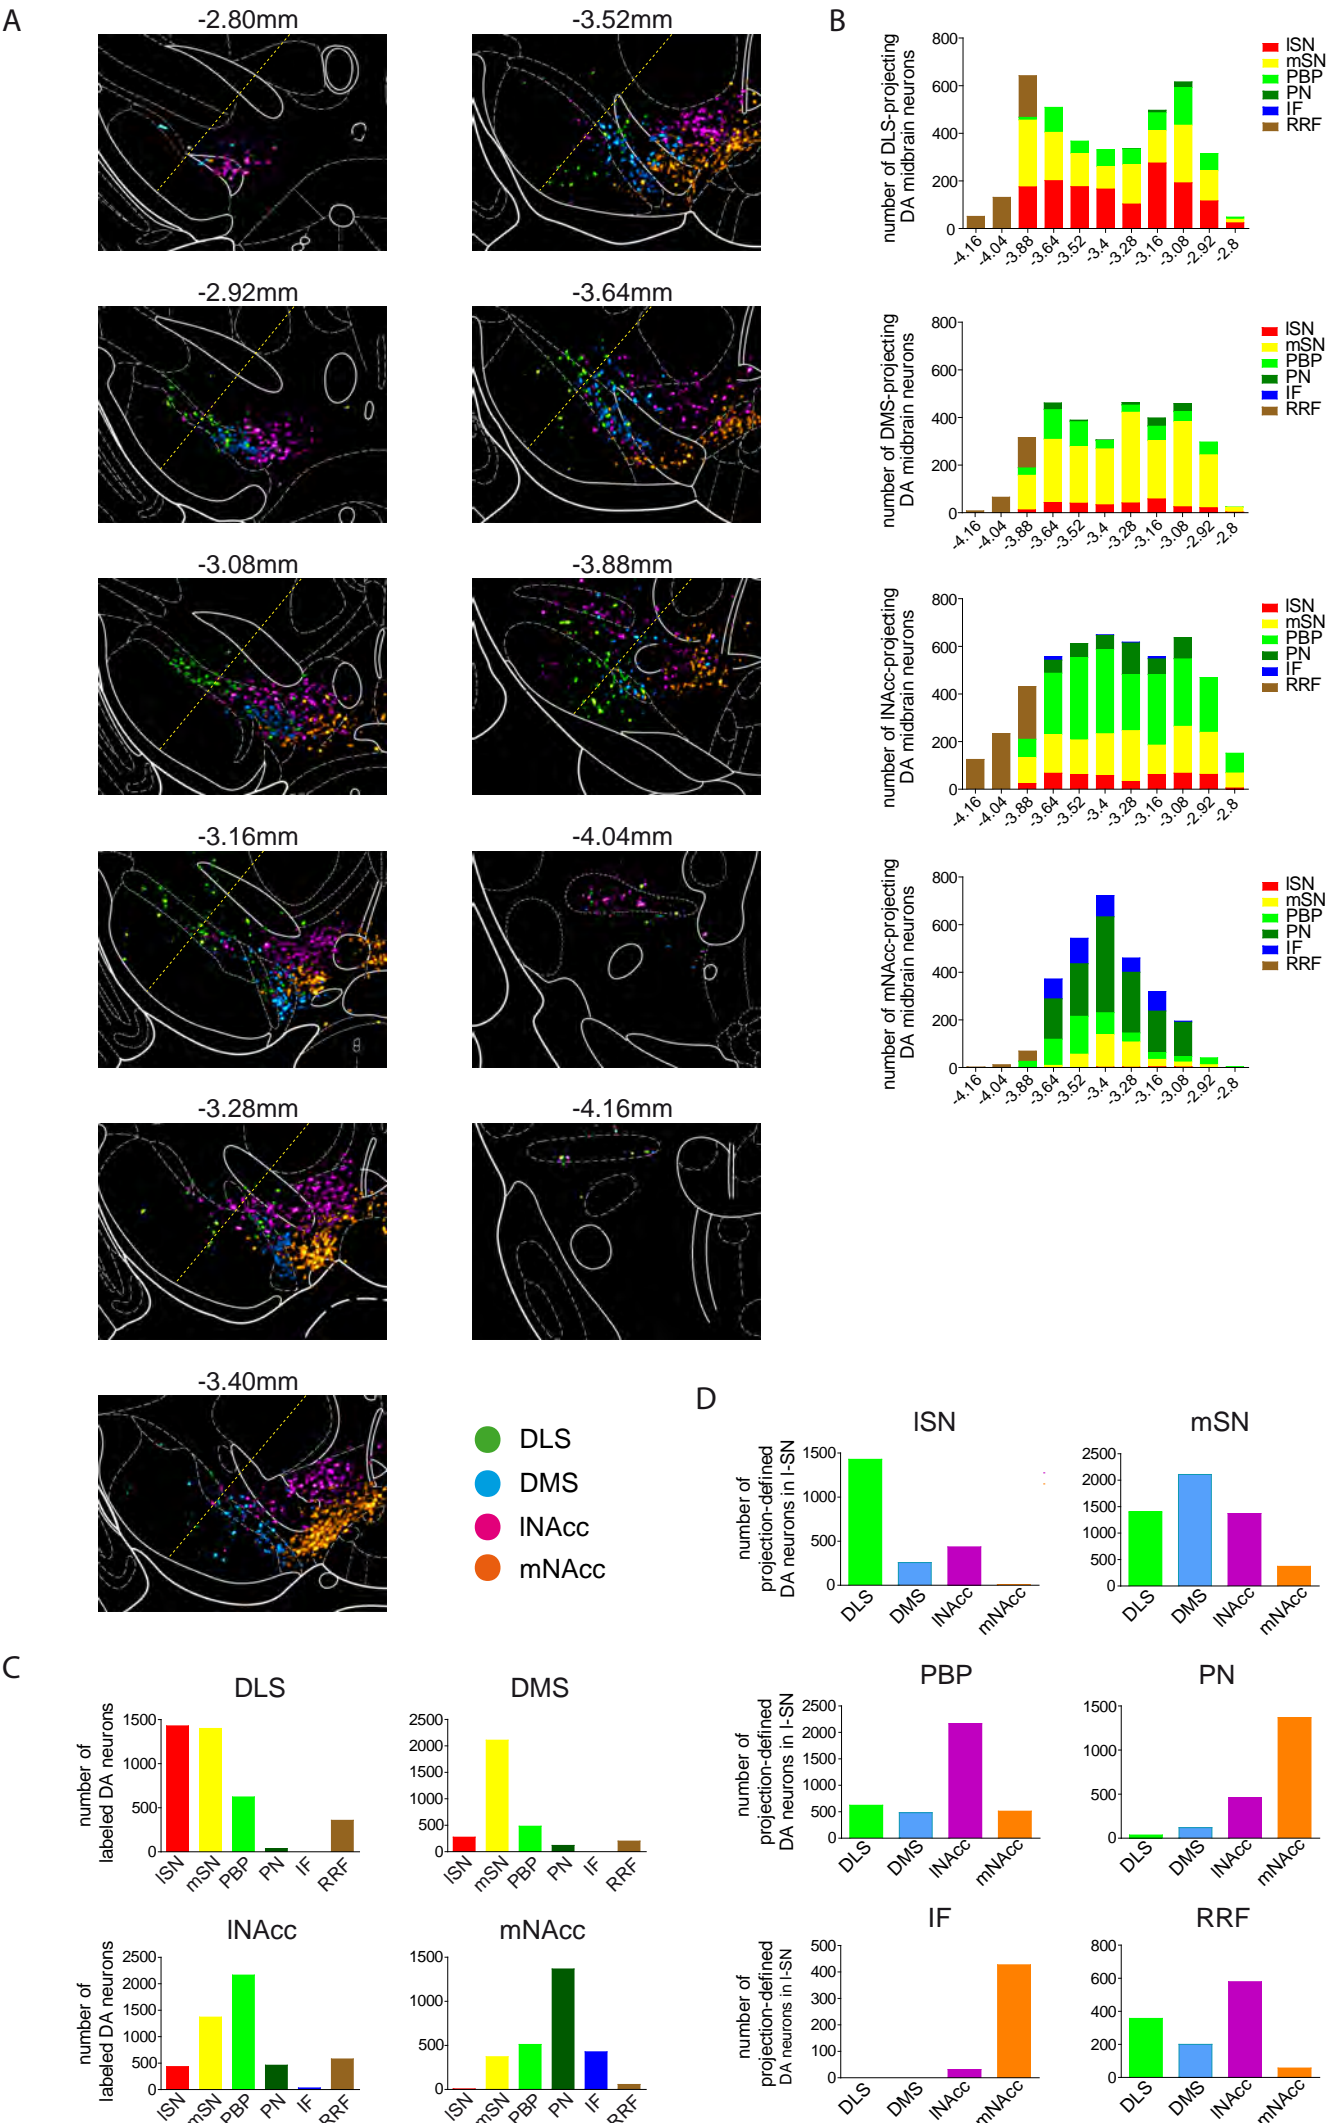

Supplement: supp [file elife-48408-supp-v1.zip]
